# Supplementary material for: Shade tree diversity enhances topsoil fertility and deep soil nutrients drive aboveground carbon storage in cocoa-based systems in Côte d’Ivoire
Source: Research Square preprint supplement (doi:10.21203/rs.3.rs-5586403/v1), 2025-03-26
Supplement: Supplementary file 1 [file c65a80afd659839a4701fe5b.xlsx]

## Sheet: Feuil1
Zone_name	Plot ID	richness	abundance	Shannon	Evenness	Cashew	Cocoa	Coffee	Rubber	Exotic	Indigenous	Palm Tree	SAF_ID4	Aboveground_Carbon (T/Ha)	Shrub	Tree 1	Tree 2	Tree 3
Duekoue	A.1.1	4	14	1.11637	0.763435	3	19	8	0	2	1	0	AF	7.31444		5.00273
Duekoue	A.1.2	0	0	0	0	0	37	0	0	0	0	0	Monocrop	1.97615		4.93833
Duekoue	A.1.3	6	18	1.24189	0.577025	0	22	11	0	0	4	3	AF	156.26		4.955
Duekoue	A.1.4	7	10	1.74807	0.820499	0	38	4	0	1	4	1	AF	135.579		5.05064	22.66
Duekoue	A.1.5	3	6	1.0114	0.916486	3	10	1	0	0	0	2	AF	8.20055		4.04188
Duekoue	A.1.7	7	10	1.8867	0.942506	0	8	0	0	0	9	1	Fallow	13.553		5.88722
Duekoue	A.1.9	5	6	1.56071	0.952441	0	10	0	0	0	6	0	AF	4.68857		5.18687
Duekoue	A.2.1	3	5	0.950271	0.862136	3	103	0	0	1	1	0	AF	9.40121	3	4.87245
Duekoue	A.2.2	5	6	1.56071	0.952441	0	8	0	1	0	5	0	AF	0.837659	3	5.25231
Duekoue	A.2.3	10	47	1.88599	0.659286	0	39	14	0	0	33	0	AF	275.036	3	5.82741		29.15
Duekoue	A.2.4	3	4	1.03972	0.942809	0	92	0	0	0	3	1	AF	119.485		5.84032	17.56
Duekoue	A.2.5	7	11	1.84622	0.905118	0	37	0	0	1	7	3	AF	343.484		6.10915	20.46
Duekoue	A.2.6	0	0	0	0	0	72	0	0	0	0	0	Monocrop	4.05955		6.20069
Duekoue	A.2.7	4	6	1.32966	0.944941	0	72	0	0	0	4	2	AF	300.198		5.51513
Duekoue	A.2.9	1	1	0	1	0	55	0	0	0	1	0	Monocrop	2.59479	3	4.29889
Duekoue	A.3.1	1	1	0	1	0	28	0	0	0	0	1	AF	163.483	3	4.46286
Duekoue	A.3.2	1	3	0	1	0	80	0	0	0	3	0	AF	6.65272		5.31012		35.8
Duekoue	A.3.4	4	6	1.32966	0.944941	0	27	0	0	0	6	0	AF	1.90205	3	4.84059
Duekoue	A.3.5	4	4	1.38629	1	0	61	0	0	2	1	1	AF	221.786		5.40215
Duekoue	A.3.6	1	1	0	1	0	66	0	0	0	1	0	Monocrop	43.5081		4.80672
Duekoue	A.3.7	3	3	1.09861	1	0	27	0	0	0	3	0	AF	67.0703		4.13517	23.6
Duekoue	A.3.8	3	3	1.09861	1	0	74	0	0	1	1	1	AF	175.128		4.88093	17.7
Duekoue	A.4.2	10	37	1.51991	0.457183	3	33	22	0	7	5	0	AF	29.6378	3	5.5358
Duekoue	A.4.3	3	4	1.03972	0.942809	0	0	0	0	0	2	2	Fallow	186.853		4.445
Duekoue	A.4.4	10	13	2.24504	0.944075	0	14	0	0	3	8	1	AF	158.946	3	5.49391	22.45
Duekoue	A.4.5	2	6	0.450561	0.784596	0	10	5	1	0	0	0	AF	0.723556	3	4.47308
Duekoue	A.5.1	2	11	0.304636	0.678066	0	29	10	0	0	1	0	AF	10.3649	3	4.98263	15.55
Duekoue	A.5.2	4	10	0.940448	0.640282	0	27	7	0	1	2	0	AF	36.1235		4.68028		25.16
Duekoue	A.5.3	3	13	0.535961	0.569697	0	23	0	0	0	13	0	AF	4.61225	3	5.07265
Duekoue	A.5.4	6	13	1.58577	0.813842	1	30	5	0	2	5	0	AF	22.7527	3	5.3122
Duekoue	A.5.5	6	11	1.54031	0.77767	0	49	5	0	2	4	0	AF	23.3124	3	5.16424
Duekoue	A.5.7	2	15	0.636514	0.944941	5	11	10	0	0	0	0	AF	2.62451		4.43654
Duekoue	A.6.1	4	4	1.38629	1	0	85	0	0	0	4	0	AF	20.5144		4.81708
Duekoue	A.6.2	3	6	0.867563	0.793701	0	84	0	0	0	6	0	AF	79.298		4.51529	20.03
Duekoue	A.6.3	3	3	1.09861	1	1	91	0	0	1	1	0	AF	29.2128		4.16576	15.765
Duekoue	A.6.4	1	1	0	1	0	88	0	0	0	1	0	Monocrop	20.8304		4.56716	15.92
Duekoue	A.6.5	4	6	1.32966	0.944941	0	84	0	0	2	4	0	AF	63.5883		4.62693	16	27.8
Duekoue	A.6.6	5	25	1.1407	0.62579	7	22	14	0	1	1	2	AF	407.952	3	3.9163
Duekoue	A.6.7	8	40	1.14839	0.39414	0	46	28	0	0	11	1	AF	371.07		3.98051	21.5475	34.3
Duekoue	A.6.8	4	11	1.03356	0.702765	2	77	7	0	1	1	0	AF	17.2573		4.51759	18.6
Guiglo	B.2.1	0	0	0	0	0	75	0	0	0	0	0	Monocrop	5.33548		7.65547
Guiglo	B.2.2	3	3	1.09861	1	0	82	0	0	3	0	0	AF	15.7216		6.20871
Guiglo	B.2.3	3	3	1.09861	1	0	52	0	0	0	3	0	AF	23.5336		7.4417	15.62
Guiglo	B.2.4	9	10	2.16396	0.967278	0	48	2	0	2	5	1	AF	535.118		7.39352	16.34	28.97
Guiglo	B.2.6	0	0	0	0	0	40	0	0	0	0	0	Monocrop	2.50964		5.809
Guiglo	B.2.7	8	9	2.04319	0.964399	0	36	0	0	0	7	2	AF	1063.92		8.69487	16.66	27.43
Guiglo	B.2.9	7	8	1.90616	0.961024	0	43	0	0	0	8	0	AF	68.2988		9.91043	19.7967	27.21
Guiglo	B.3.9	5	5	1.60944	1	0	0	0	0	0	3	1	Fallow	6.53396		10.1175	17.25
Guiglo	B.4.1	3	4	1.03972	0.942809	0	37	0	0	3	1	0	AF	13.5588		7.06707
Guiglo	B.4.2	5	8	1.38629	0.8	0	8	4	0	0	4	0	AF	6.63593		9.18562
Guiglo	B.4.3	0	0	0	0	0	64	0	0	0	0	0	Monocrop	3.87114		6.26516
Guiglo	B.4.4	0	0	0	0	0	23	0	0	0	0	0	Monocrop	1.36303		6.84217
Guiglo	B.4.6	7	8	1.90616	0.961024	0	27	1	0	0	7	0	AF	97.8499		7.09094	23.0267
Guiglo	B.4.7	2	2	0.693147	1	0	60	0	0	0	2	0	AF	51.2196		5.5715	18.425
Guiglo	B.5.2	6	29	1.11006	0.505757	0	28	0	20	1	6	2	AF	173.655		10.2436	21.56	27.23
Guiglo	B.5.3	6	49	0.993596	0.450155	0	27	16	29	0	4	0	AF	105.653		8.94028	15.684
Guiglo	B.5.4	0	0	0	0	0	30	0	0	0	0	0	Monocrop	1.94017		7.53867
Guiglo	B.5.5	5	6	1.56071	0.952441	0	37	0	0	0	6	0	AF	348.797		9.12	21.105	30.73
Guiglo	B.5.6	1	21	0	1	0	26	0	21	0	0	0	AF	25.1663		9.66298
Guiglo	B.6.1	3	4	1.03972	0.942809	0	68	0	2	0	2	0	AF	326.332		7.58535
Guiglo	B.6.2	2	2	0.693147	1	0	72	0	0	0	2	0	AF	36.2797		7.26671	19.78
Guiglo	B.6.3	1	6	0	1	0	23	7	0	0	0	0	AF	2.766		7.36138
Guiglo	B.6.4	0	0	0	0	0	69	0	0	0	0	0	Monocrop	4.48591		6.60101
Guiglo	B.6.5	2	2	0.693147	1	0	28	1	0	1	0	0	AF	18.3392		6.69517	16.32
Guiglo	B.6.7	4	4	1.38629	1	0	61	0	0	1	3	0	AF	37.8918		7.04698	21.25
Guiglo	B.6.8	1	7	0	1	0	58	7	0	0	0	0	AF	5.57379		7.95877
Guiglo	B.6.9	11	15	2.24595	0.859037	0	5	0	0	1	13	1	Fallow	383.159		10.0129	20.265	27.19
Guiglo	B.7.1	0	0	0	0	0	49	0	0	0	0	0	Monocrop	3.82851		8.20245
Guiglo	B.7.2	0	0	0	0	0	73	0	0	0	0	0	Monocrop	5.53809		10.2776		47
Guiglo	B.7.3	4	22	0.548118	0.432498	0	32	19	0	0	3	0	AF	44.2458		8.17		32.17
Guiglo	B.7.4	8	9	2.04319	0.964399	0	1	0	0	2	6	1	Fallow	46.3456		10.3333	17.53
Guiglo	B.7.5	9	12	2.13833	0.942809	2	3	1	0	0	9	0	AF	24.4475		9.27818	18.1667	27.85
Guiglo	B.7.6	0	0	0	0	0	72	0	0	0	0	0	Monocrop	5.06993		5.33634
Guiglo	B.7.7	2	2	0.693147	1	0	0	0	0	0	2	0	Fallow	5.28742		11.11
Guiglo	B.7.9	2	4	0.562335	0.877383	3	55	1	0	0	0	0	AF	8.82427		7.32586
San_Pedro	C.2.2	3	8	0.735622	0.695593	0	7	0	0	1	1	6	AF	1545.5		5.22417	20.48
San_Pedro	C.2.3	4	13	1.11897	0.765424	0	6	0	0	0	8	5	Fallow	1256.03		5.62105
San_Pedro	C.2.4	0	0	0	0	0	29	0	0	0	0	0	Monocrop	1.56411		4.68793
San_Pedro	C.2.5	6	13	1.67159	0.886775	0	0	0	0	0	11	2	Fallow	506.068		5.35308
San_Pedro	C.2.6	0	0	0	0	0	31	0	0	0	0	0	Monocrop	1.7254		5.07677
San_Pedro	C.2.8	3	4	1.03972	0.942809	0	17	0	0	0	2	0	AF	165.759		5.06389	23.2967
San_Pedro	C.3.1	1	1	0	1	0	46	0	0	0	0	1	AF	224.185		4.85149
San_Pedro	C.3.2	1	1	0	1	0	55	0	0	1	0	0	Monocrop	3.57639		4.47618		48
San_Pedro	C.3.3	0	0	0	0	0	67	0	0	0	0	0	Monocrop	4.1881		4.87896
San_Pedro	C.3.4	0	0	0	0	0	26	0	0	0	0	0	Monocrop	1.82121		5.68731
San_Pedro	C.3.5	2	2	0.693147	1	0	0	0	0	0	2	0	Fallow	28.283			20.235
San_Pedro	C.3.7	2	2	0.693147	1	0	76	0	0	0	2	0	AF	89.7634		4.78382	23	34.64
San_Pedro	C.4.1	0	0	0	0	0	44	0	0	0	0	0	Monocrop	3.24308		5.78432
San_Pedro	C.4.2	1	2	0	1	0	46	0	0	2	0	0	AF	4.84758		7.61833
San_Pedro	C.4.3	0	0	0	0	0	56	0	0	0	0	0	Monocrop	3.94042		5.33821
San_Pedro	C.4.4	1	1	0	1	0	35	0	0	1	0	0	Monocrop	3.27621		5.68556
San_Pedro	C.4.5	2	3	0.636514	0.944941	0	46	0	0	1	0	2	AF	247.864		5.59837
San_Pedro	C.4.6	1	1	0	1	0	52	0	0	1	0	0	Monocrop	4.75998		8.55396
San_Pedro	C.4.7	1	1	0	1	0	41	0	0	1	0	0	Monocrop	2.7895		5.33548
San_Pedro	C.4.8	3	3	1.09861	1	0	41	0	0	1	0	2	AF	15.917		5.44682
San_Pedro	C.4.9	0	0	0	0	0	58	0	0	0	0	0	Monocrop	4.20575		8.04172
San_Pedro	C.5.1	3	4	1.03972	0.942809	0	35	0	0	1	0	1	AF	352.184		5.3675	24.38	29.685
San_Pedro	C.5.2	3	6	0.867563	0.793701	0	18	0	0	0	6	0	AF	190.428		4.90087		43
San_Pedro	C.5.3	5	6	1.56071	0.952441	0	2	0	1	2	2	1	Fallow	242.42		6.89
San_Pedro	C.5.4	6	10	1.64342	0.862136	0	4	0	0	0	10	0	Fallow	64.3008		4.73462		26.37
San_Pedro	C.6.1	1	3	0	1	0	35	0	0	0	0	3	AF	394.269		5.25447
San_Pedro	C.6.2	1	1	0	1	0	43	0	0	0	1	0	Monocrop	15.414		5.69432
San_Pedro	C.6.3	1	1	0	1	0	62	0	0	1	0	0	Monocrop	7.3024		5.9354
San_Pedro	C.6.4	2	4	0.562335	0.877383	0	43	0	0	3	0	1	AF	212.594		4.70553
San_Pedro	C.6.5	3	6	0.867563	0.793701	0	42	4	0	1	0	1	AF	137.164		4.98167
San_Pedro	C.6.6	4	4	1.38629	1	0	37	1	0	1	2	0	AF	11.751		5.36275		32
San_Pedro	C.6.7	3	3	1.09861	1	0	66	0	0	0	3	0	AF	64.1397		5.78059	24.78
San_Pedro	C.6.8	3	4	1.03972	0.942809	0	0	0	0	0	3	1	Fallow	131.725		6.7975
San_Pedro	C.6.9	0	0	0	0	0	51	0	0	0	0	0	Monocrop	2.1388		4.2398
Oume	D.1.3	2	6	0.693147	1	0	65	0	0	3	0	3	AF	1172.19		5.09408
Oume	D.1.4	9	15	2.06111	0.872745	1	24	0	0	3	7	4	AF	1576.18	3	5.39639	21.615
Oume	D.1.5	5	6	1.56071	0.952441	0	65	0	0	2	4	0	AF	21.3052		4.42943	21.26
Oume	D.1.6	5	9	1.52296	0.917151	0	51	0	0	3	5	1	AF	415.65		4.81085	16.38
Oume	D.1.8	4	7	1.27703	0.896497	0	34	0	0	0	5	2	AF	1084.32		4.64289		37.84
Oume	D.2.2	4	8	1.21301	0.840896	0	62	4	0	0	4	0	AF	120.151	3	4.11561		37.6
Oume	D.2.4	5	6	1.56071	0.952441	0	67	0	0	5	0	1	AF	306.809	3	4.27577
Oume	D.2.5	3	9	0.848686	0.778858	0	63	2	0	0	6	1	AF	324.43	3	4.86718
Oume	D.2.7	3	11	0.859967	0.787694	0	28	0	0	0	11	0	AF	5.03696		5.41211	17.3
Oume	D.2.9	11	17	2.28237	0.890902	0	0	0	0	1	16	0	Fallow	4.71145		7.76059
Oume	D.3.1	5	9	1.30309	0.736132	0	29	0	0	2	2	5	AF	1331.62		4.79973		27.3
Oume	D.3.2	2	5	0.500402	0.824692	0	32	0	0	0	5	0	AF	3.58728	3	4.50861
Oume	D.3.3	4	7	1.27703	0.896497	3	33	0	0	2	1	1	AF	242.464	3	4.14105
Oume	D.3.4	1	3	0	1	0	26	0	0	0	0	3	AF	741.251	3	4.06583
Oume	D.3.5	4	5	1.33218	0.947323	0	37	2	0	1	1	1	AF	251.285	3	3.77972
Oume	D.3.6	5	5	1.60944	1	0	39	0	0	0	4	1	AF	247.647		4.11955
Oume	D.3.7	2	2	0.693147	1	0	0	0	0	0	2	0	Fallow	0.0177617		3.315
Oume	D.3.8	5	5	1.60944	1	0	27	0	0	3	2	0	AF	13.7357		4.33469
Oume	D.3.9	10	28	2.04493	0.772863	0	9	4	0	0	14	2	AF	510.287		5.75333	20.1
Oume	D.4.1	4	6	1.24245	0.866025	0	64	1	0	3	1	0	AF	157.891	3	4.47015		34.42
Oume	D.4.2	3	3	1.09861	1	0	23	0	0	0	2	1	AF	375.713	3	4.18348
Oume	D.4.3	2	5	0.673012	0.980066	3	14	0	0	2	0	0	AF	1.05146	3	3.78941
Oume	D.4.4	4	6	1.32966	0.944941	0	91	0	0	3	1	2	AF	779.734		4.11875	16.28
Oume	D.4.5	2	3	0.636514	0.944941	0	104	0	0	3	0	0	AF	17.9075	3	4.31943	16.75
Oume	D.4.6	17	38	2.58827	0.782753	0	3	0	0	0	35	3	Fallow	1080.61	3	6.277
Oume	D.4.7	9	53	1.87415	0.723922	0	0	0	0	0	43	0	Fallow	120.391	3	6.03524	18.7471	28.1667
Oume	D.4.8	5	8	1.49418	0.891132	0	56	0	0	3	5	0	AF	254.425		4.54145		36.875
Oume	D.4.9	8	13	1.92512	0.856997	0	0	0	0	0	13	0	Fallow	8.17929	3	7.56727
Oume	D.5.1	4	13	1.11897	0.765424	0	2	0	0	5	2	6	Fallow	2620.35		6.21786
Oume	D.5.4	9	56	1.86434	0.716852	0	0	0	0	0	53	3	Fallow	1212.77	3	6.48037
Oume	D.5.5	8	26	1.66411	0.660123	0	0	1	0	1	23	1	Fallow	414.051		4.72231
Oume	D.5.6	9	29	1.90706	0.74814	0	0	0	0	4	22	2	Fallow	803.554	3	5.00393
Agboville	E.1.1	7	7	1.94591	1	0	28	0	0	1	5	1	AF	681.552		6.32071	18.73	33.67
Agboville	E.1.2	12	14	2.44102	0.957058	0	31	0	0	4	10	0	AF	443.608		7.33242	18.666	32.8386
Agboville	E.1.4	8	11	1.97225	0.898351	0	34	0	0	0	11	0	AF	505.886		6.57974		30.8429
Agboville	E.1.6	5	5	1.60944	1	0	24	0	0	0	4	1	AF	202.245		7.2096	18.1567	29.8
Agboville	E.1.7	9	10	2.16396	0.967278	0	22	0	0	0	10	0	AF	186.763		7.1464	19.118	33.75
Agboville	E.1.8	2	2	0.693147	1	0	47	0	0	0	2	0	AF	262.564		8.03729		39.86
Agboville	E.1.9	7	16	1.52688	0.657683	0	43	0	0	1	15	0	AF	204.917		8.49204	18.2614	27.8633
Agboville	E.2.1	4	6	1.24245	0.866025	0	61	0	0	1	5	0	AF	54.3145		8.54862	20.33
Agboville	E.2.2	5	7	1.47508	0.874274	0	15	0	0	0	6	1	AF	296.273		8.79857	16.89
Agboville	E.2.3	8	10	1.973	0.899029	0	38	0	0	1	8	1	AF	299.748		7.77915	24.59
Agboville	E.2.4	9	10	2.16396	0.967278	0	0	0	0	0	10	0	Fallow	296.404		11.795	20.29	28.905
Agboville	E.2.5	3	3	1.09861	1	0	61	0	0	0	3	0	AF	26.4729		7.59639	18.97
Agboville	E.2.6	4	8	1.25548	0.877383	0	7	0	0	1	4	3	AF	949.16		7.88222	18.935
Agboville	E.2.7	8	12	1.97921	0.904623	0	66	0	0	3	9	0	AF	366.383		7.56182	18.7271	34.052
Agboville	E.2.8	3	5	1.05492	0.957249	0	63	0	0	2	3	0	AF	51.0001		7.57078	19.335
Agboville	E.2.9	5	6	1.56071	0.952441	0	13	0	0	0	6	0	AF	141.631		9.24625	18.065	31.12
Agboville	E.3.1	0	0	0	0	0	54	0	0	0	0	0	Monocrop	3.37074		7.47604
Agboville	E.3.2	2	2	0.693147	1	0	60	0	0	1	1	0	AF	151.238		7.566		37.52
Agboville	E.3.3	0	0	0	0	0	30	0	0	0	0	0	Monocrop	1.89719		7.123
Agboville	E.3.4	1	2	0	1	0	30	0	0	0	2	0	AF	11.5408		6.00258	15.23
Agboville	E.3.5	0	0	0	0	0	31	0	0	0	0	0	Monocrop	1.9371		7.6271
Agboville	E.3.6	12	13	2.45831	0.973755	0	50	0	0	0	12	0	AF	73.4206		7.64051	18.3967	27.65
Agboville	E.3.7	3	4	1.03972	0.942809	0	28	0	0	0	3	1	AF	551.655		6.89241	21.4033
Agboville	E.3.8	2	2	0.693147	1	0	14	1	0	0	1	0	AF	7.23032		8.202	16.32
Agboville	E.4.1	1	1	0	1	0	45	0	0	1	0	0	Monocrop	4.24694		7.06826
Agboville	E.4.2	14	17	2.58857	0.950769	0	0	0	0	0	17	0	Fallow	309.179		10.965	18.9975	31.6786
Agboville	E.4.3	11	20	2.02533	0.688962	0	0	0	0	0	20	0	Fallow	196.998		11.0417	18.52	30.21
Agboville	E.4.4	2	4	0.693147	1	0	63	0	0	0	4	0	AF	22.5539		8.45754	18.5
Agboville	E.4.5	1	1	0	1	0	50	0	0	0	1	0	Monocrop	4.84		8.63157
Agboville	E.4.6	8	10	2.02533	0.947323	0	25	0	0	0	9	0	AF	26.0261		7.29441	17.68
Agboville	E.4.7	0	0	0	0	0	60	0	0	0	0	0	Monocrop	3.50121		7.59517
Agboville	E.4.8	18	24	2.80968	0.922476	0	0	0	0	0	23	1	Fallow	881.209		12.4125	18.0013	30.6125
Agboville	E.4.9	12	14	2.44102	0.957058	0	11	0	0	0	14	0	Fallow	116.111		8.10176	18.8433	32.58
Abengourou	F.1.1	4	19	1.05968	0.721365	0	32	11	0	2	1	5	AF	1674.17		6.51471
Abengourou	F.1.2	2	6	0.636514	0.944941	0	36	4	0	0	2	0	AF	6.2855		6.31762
Abengourou	F.1.3	10	25	2.16878	0.874758	0	6	1	0	0	20	4	AF	1647.81		6.80231	17	37.0294
Abengourou	F.1.4	1	1	0	1	0	28	0	0	0	1	0	Monocrop	2.28624		5.09
Abengourou	F.1.5	3	9	0.995027	0.901599	0	0	0	0	0	5	2	Fallow	759.039		7.54444
Abengourou	F.1.6	5	9	1.46482	0.86535	0	0	0	0	0	6	3	Fallow	983.916		7.09333
Abengourou	F.1.9	9	12	2.09473	0.902582	0	0	0	0	0	11	1	Fallow	360.879		8.79375	20
Abengourou	F.2.1	1	7	0	1	0	57	0	7	0	0	0	AF	22.3511		5.8995	16.925
Abengourou	F.2.2	0	0	0	0	0	52	0	0	0	0	0	Monocrop	2.78286		5.32019
Abengourou	F.2.3	0	0	0	0	0	65	0	0	0	0	0	Monocrop	3.48679		5.58985
Abengourou	F.2.4	0	0	0	0	0	62	0	0	0	0	0	Monocrop	3.30448		5.70968
Abengourou	F.2.5	2	3	0.636514	0.944941	0	25	0	0	0	1	2	AF	606.843		4.55222		32.3
Abengourou	F.2.8	6	17	1.49769	0.745222	0	0	0	0	0	17	0	Fallow	11.0363		8.38235
Abengourou	F.3.1	0	0	0	0	0	91	0	0	0	0	0	Monocrop	4.8489		5.43198
Abengourou	F.3.2	1	1	0	1	0	95	0	0	0	1	0	Monocrop	12.1508		5.33
Abengourou	F.3.3	3	4	1.03972	0.942809	0	115	1	0	0	3	0	AF	17.2269		5.3163
Abengourou	F.3.4	0	0	0	0	0	106	0	0	0	0	0	Monocrop	5.64738		5.07151
Abengourou	F.3.5	4	4	1.38629	1	0	56	0	0	0	4	0	AF	285.337		3.80789	17	35
Abengourou	F.3.6	4	5	1.33218	0.947323	0	49	0	0	1	3	1	AF	483.293		5.41843	16.32	31
Abengourou	F.3.7	1	2	0	1	0	45	0	0	2	0	0	AF	2.67155		4.9917
Abengourou	F.3.8	0	0	0	0	0	38	0	0	0	0	0	Monocrop	2.24102		5.62026
Abengourou	F.3.9	8	51	1.38329	0.498502	0	3	0	0	0	51	0	Fallow	15.3236		6.33889
Abengourou	F.4.2	5	9	1.42706	0.833287	0	24	4	0	1	4	0	AF	1.98028		5.16212
Abengourou	F.4.3	3	4	1.03972	0.942809	0	26	2	1	0	1	0	AF	10.9193		5.39567
Abengourou	F.4.5	1	3	0	1	0	31	3	0	0	0	0	AF	1.66953		5.24394
Abengourou	F.4.8	5	7	1.54983	0.94213	0	26	0	1	0	4	2	AF	853.093		5.47312	15.5
Abengourou	F.5.1	0	0	0	0	0	52	0	0	0	0	0	Monocrop	2.63827		5.60192
Abengourou	F.5.2	2	14	0.257319	0.646729	0	29	13	0	0	1	0	AF	73.2891		5.17429	23.48
Abengourou	F.5.3	4	8	1.07354	0.731432	0	28	5	0	1	2	0	AF	33.4091		5.226		25.7
Abengourou	F.5.6	2	5	0.500402	0.824692	0	68	4	0	0	1	0	AF	9.32217		5.58375	17.4
Abengourou	F.5.8	4	4	1.38629	1	0	26	1	0	0	3	0	AF	152.857		6.63964		30
Abengourou	F.6.1	5	6	1.56071	0.952441	0	43	1	0	0	3	2	AF	603.611		5.36417		29.3
Abengourou	F.6.2	1	1	0	1	0	69	0	0	0	1	0	Monocrop	57.19		5.87406		31
Abengourou	F.6.3	1	1	0	1	0	51	0	0	0	1	0	Monocrop	25.2711		4.87353	17.5
Abengourou	F.6.4	2	4	0.562335	0.877383	0	62	3	0	1	0	0	AF	6.43755		5.8653
Abengourou	F.6.5	5	11	1.36671	0.784486	0	34	5	3	0	2	1	AF	408.198		5.85068		28
Abengourou	F.6.6	5	10	1.35924	0.778644	0	2	0	2	0	3	5	Fallow	1624.35		6.08182	17.4
Abengourou	F.6.7	1	3	0	1	0	0	0	0	0	3	0	Fallow	0.649086		5.5
Abengourou	F.6.9	4	5	1.33218	0.947323	0	0	0	0	0	4	1	Fallow	320.711		8.125	24.26

## Sheet: Feuil2
Richness
