# Supplementary material for: Shade tree diversity enhances topsoil fertility and deep soil nutrients drive aboveground carbon storage in cocoa-based systems in Côte d’Ivoire
Source: Research Square preprint supplement (doi:10.21203/rs.3.rs-5586403/v1), 2025-03-26
Supplement: Supplementary file 2 [file df9ec6a4c8e746a03dfbcb74.xlsx]

## Sheet: 20-50
Plot_ID	Depth	pH	SOC	SOM	TN	m3Al	m3B	m3Ca	m3Fe	m3K	m3Mg	ExAc	Expr1015	PSI	CEC	Clay	Silt	Sand	SSSI	Zone_name	SAF_ID4
F.2.5	20_50	5.2	0.9	1.5516	0.11	1090.93	0.25	755.73	207.52	65.72	127.35	0.6	126.76	126.76	8.24	63.42	19.78	16.8	1.8649	Abengourou	AF
F.3.7	20_50	6.05	1	1.724	0.12	998.28	0.3	1113.22	82.13	89.34	168.34	0.37	101.62	101.62	9.67	63.95	16.23	19.82	2.15016	Abengourou	AF
F.3.5	20_50	6.31	1.16	1.99984	0.13	1136.84	0.39	1598.83	118.2	145.84	218.4	0.33	112.62	112.62	10.27	64.07	16.48	19.45	2.48273	Abengourou	AF
F.3.6	20_50	5.36	0.23	0.39652	0.04	685.43	0.19	476.77	134.46		73.67	0.46	100.83	100.83	3.4	37.15	20.69	42.16	0.685546	Abengourou	AF
F.4.5	20_50	5.63	0.51	0.87924	0.05	960.18	0.25	748.83	145.87		123.04	0.45	93.86	93.86	9.65	49.62	14.41	35.97	1.37317	Abengourou	AF
F.3.3	20_50	6.67	0.05	0.0862	0.03	428.33	0.13	529.67	92.4	35.2	28.87	0.3	43.11	43.11	3.34	24.04	15.63	60.33	0.217293	Abengourou	AF
F.5.8	20_50	4.8	0.76	1.31024	0.1	1130.5	0.2	720.77	175.69	43.56	109.72	0.7	130.73	130.73	9.27	65.79	17.19	17.02	1.57898	Abengourou	AF
F.6.4	20_50	5.74	0.7	1.2068	0.1	1070.37	0.23	1036.41	128.16	20.15	145.24	0.54	123.08	123.08	7.75	63.35	17.19	19.46	1.49839	Abengourou	AF
F.4.3	20_50	6.43	0.53	0.91372	0.05	474.9	0.19	507.35	237.53	74.9	99.96	0.33	49.1	49.1	3.01	25.83	20.18	53.99	1.98592	Abengourou	AF
E.1.8	20_50	5.66	0.22	0.37928	0.04	440.15	0.12	382.05	158.42			0.33	78.14	78.14	2.82	21.7	23.14	55.16	0.845852	Agboville	AF
E.3.4	20_50	7.86	1.28	2.20672	0.07	657.44	0.42	2111.41	151.13	61.28	178.65	0.33	43.27	43.27	11.94	36.14	17.29	46.57	4.13011	Agboville	AF
E.2.5	20_50	5.53	0.84	1.44816	0.11	851.66	0.27	528.55	249.41	32.26	22.52	0.35	90.74	90.74	7.23	49.33	21.05	29.62	2.05763	Agboville	AF
E.3.2	20_50	5.59	0.38	0.65512	0.02	538.96	0.14	203.57	257.71	61.71	95.53	0.29	51.6	51.6	6.03	31.15	11.39	57.46	1.54001	Agboville	AF
E.3.8	20_50	5.97	0.84	1.44816	0.07	769.55	0.31	975.82	190.06	38.82	148.53	0.32	71.74	71.74	9.08	49.78	14.24	35.98	2.26204	Agboville	AF
E.3.7	20_50	5.53	0.6	1.0344	0.04	611.37	0.17	428.11	242.6	31.76	82.32	0.28	60.82	60.82	6.52	32.1	18.75	49.15	2.03422	Agboville	AF
E.4.4	20_50	5.31	0.58	0.99992	0.07	950.64	0.19	544.11	161.62	23.11	71.6	0.47	137.36	137.36	6.16	58.76	13.38	27.86	1.38608	Agboville	AF
E.1.6	20_50	6.43	0.36	0.62064	0.03	442.37	0.18	785.12	201.12	58.48	246.4	0.27	57.59	57.59	7.86	22.43	16.73	60.84	1.58488	Agboville	AF
C.6.1	20_50	5.09	0.57	0.98268	0.06	977.84	0.19	266.11	138.32	4.66	87.13	0.63	105.89	105.89	2.88	61.83	10.85	27.32	1.35206	San_Pedro	AF
C.3.7	20_50	5.18	1.07	1.84468	0.13	1024.59	0.43	335.04	132.37	33.02	236.1	0.78	120.15	120.15	7.28	68.44	13.32	18.24	2.25621	San_Pedro	AF
C.2.8	20_50	4.99	0.63	1.08612	0.05	1000.52	0.19	90.67	287.01	31.58	110.99	0.64	102.15	102.15	8.45	55.96	16.45	27.59	1.49996	San_Pedro	AF
C.6.7	20_50	5.2	0.43	0.74132	0.04	756.95	0.16		206.21	36.7	74.76	0.76	123	123		37.83	18.2	43.97	1.32308	San_Pedro	AF
C.4.8	20_50	5.9	0.69	1.18956	0.1	932.37	0.33	512.31	110.35	39.61	139.84	0.42	139.56	139.56	3.3	62.74	12.17	25.09	1.58799	San_Pedro	AF
C.5.1	20_50	4.98	0.46	0.79304	0.03	683.19	0.14	43.87	151.26		74.65	0.59	92.88	92.88	1.7	37.8	15.58	46.62	1.48565	San_Pedro	AF
C.4.2	20_50	6.12	0.23	0.39652	0.05	770.98	0.35	490.44	101.79	28.42	64.42	0.33	48.95	48.95	3.1	36.52	17.49	45.99	0.73416	San_Pedro	AF
C.6.4	20_50	5	0.69	1.18956	0.05	641.06	0.18	81.83	162.67	8.62	74.47	0.49	66.84	66.84	0.19	34.21	15.86	49.93	2.37579	San_Pedro	AF
C.6.6	20_50	5.04	0.71	1.22404	0.09	1046	0.25	255.02	180.86	68.73	45.03	0.76	157.22	157.22	5.21	70.97	11.07	17.96	1.492	San_Pedro	AF
A.3.2	20_50	6.76	1.42	2.44808	0.1	757.72	0.48	1393.66	103.21	175.58	165.85	0.35	33.37	33.37	6.23	36.36	18.81	44.83	4.43734	Duekoue	AF
A.3.7	20_50	5.86	0.64	1.10336	0.08	979.55	0.28	402.88	83.97	27.89	81.17	0.43	80.41	80.41	1.66	49.85	16.96	33.19	1.65149	Duekoue	AF
F.2.2	20_50	5.67	0.93	1.60332	0.12	969.17	0.33	735.92	127.05	92.79	95.8	0.4	102.56	102.56	7.56	55.11	21.22	23.67	2.10051	Abengourou	Monocrop
F.2.3	20_50	5.55	0.77	1.32748	0.1	1127.42	0.25	789.4	149.6	53.83	117.84	0.54	117.67	117.67	8.05	67.62	15.39	16.99	1.59918	Abengourou	Monocrop
F.2.4	20_50	5.11	0.66	1.13784	0.1	1218.01	0.25	633.61	117.7	59.53	11.79	0.69	193.33	193.33	8.01	73.91	12.96	13.13	1.30982	Abengourou	Monocrop
F.3.1	20_50	6.08	0.92	1.58608	0.12	1076.04	0.36	1045.64	121.92	89.37	141.03	0.37	106.37	106.37	7.16	63.59	16.05	20.36	1.99156	Abengourou	Monocrop
F.3.4	20_50	5.85	0.91	1.56884	0.13	1098.96	0.34	1162.6	132.89	61.59	153.95	0.45	114.27	114.27	7.29	60.27	17.94	21.79	2.00593	Abengourou	Monocrop
F.3.8	20_50	5.92	1.82	3.13768	0.16	1084.93	0.42	1560.42	112.09	210.66	257.79	0.29	76.77	76.77	11.56	52.73	23.71	23.56	4.10476	Abengourou	Monocrop
F.5.1	20_50	5.4	0.94	1.62056	0.13	1145.79	0.35	948.27	164.62	29.8	149.8	0.45	124.95	124.95	9.13	65.68	14.98	19.34	2.00912	Abengourou	Monocrop
F.1.4	20_50	5.57	0.79	1.36196	0.07	1110.17	0.31	446.04	46.43	64.79	92.36	0.37	59.03	59.03	5.33	35.34	20.49	44.17	2.43948	Abengourou	Monocrop
F.3.2	20_50	5.7	0.73	1.25852	0.1	1045.6	0.23	748.81	146.07	81.75	169.38	0.44	112.9	112.9	6.58	59.03	18.18	22.79	1.63	Abengourou	Monocrop
F.6.2	20_50	6.12	0.73	1.25852	0.09	827.51	0.27	811.04	125.63	56.23	197.46	0.36	105.59	105.59	7.37	51.4	20.06	28.54	1.76115	Abengourou	Monocrop
F.6.3	20_50	6.04	0.5	0.862	0.09	914.16	0.26	691.95	130.65	51.28	169.33	0.51	130.23	130.23	6.41	55.4	18	26.6	1.17439	Abengourou	Monocrop
E.3.1	20_50	5.68	0.6	1.0344	0.05	773.59	0.23	735.58	151.77	7.46	122.73	0.34	82.41	82.41	8.73	49.88	13.91	36.21	1.62157	Agboville	Monocrop
E.3.3	20_50	5.65	0.32	0.55168	0.03	598.75	0.17	600.36	158.78	15.17	92.15	0.32	60.03	60.03	6.88	33.92	11.02	55.06	1.22759	Agboville	Monocrop
E.3.5	20_50	5.54	0.46	0.79304	0.04	749.99	0.21	577.29	157.93	20.29	138.19	0.37	82.62	82.62	9.63	46.58	15.56	37.86	1.27621	Agboville	Monocrop
E.4.7	20_50	6.32	0.79	1.36196	0.06	694.15	0.32	1062.94	144.5	54.35	75.73	0.4	63.31	63.31	7.67	39.58	11.32	49.1	2.67576	Agboville	Monocrop
E.4.5	20_50	5.5	0.79	1.36196	0.06	763.56	0.21	641.93	237.83	43.45	127.68	0.49	104.65	104.65	8.79	46.98	16.03	36.99	2.1615	Agboville	Monocrop
E.4.1	20_50	6.15	1.06	1.82744	0.11	991.77	0.43	2044.06	150.19	84.57	307.81	0.49	114.18	114.18	14.38	63.4	11.92	24.68	2.42623	Agboville	Monocrop
C.2.4	20_50	5.45	0.39	0.67236	0.09	992.05	0.3		150.23		165.1	0.86	169.59	169.59	4.98	68.26	10.78	20.96	0.850658	San_Pedro	Monocrop
C.2.6	20_50	4.84	0.58	0.99992	0.09	1014.01	0.26		172.32	41.11	89.37	0.92	139.76	139.76	3.5	70.86	10.72	18.42	1.22569	San_Pedro	Monocrop
C.3.3	20_50	5.53	0.89	1.53436	0.1	917.13	0.4	589.27	177.03	56.16	136.44	0.53	94.62	94.62	5.51	58.33	10.78	30.89	2.22017	San_Pedro	Monocrop
C.3.4	20_50	5.22	0.39	0.67236	0.07	967.39	0.29	245.61	138.38	131.64	121.14	0.83	148.55	148.55	3.65	64.19	9.73	26.08	0.909578	San_Pedro	Monocrop
C.4.1	20_50	6.55	0.28	0.48272	0.05	664.97	0.34	691.2	81.16	63.8	91.94	0.25	39.72	39.72	3.24	30.15	20.7	49.15	0.949302	San_Pedro	Monocrop
C.4.3	20_50	6.32	0.3	0.5172	0.05	710.17	0.37	587.81	88.67	43.38	89.5	0.24	50.95	50.95	5.18	31.08	18.69	50.23	1.03918	San_Pedro	Monocrop
C.4.9	20_50	6.09	0.26	0.44824	0.04	609.02	0.27	411.19	127.6	55.28	83	0.24	58.08	58.08	2.66	35.34	16.8	47.86	0.859685	San_Pedro	Monocrop
C.6.9	20_50	5.17	0.1	0.1724	0.02	351.93	0.12	80.6	127.69	24.51	41.6	0.28	62.91	62.91	3.79	12.56	8.17	79.27	0.831645	San_Pedro	Monocrop
C.3.1	20_50	4.7	0.74	1.27576	0.09	1449.27	0.18		182.35		131.78	1.98	181.23	181.23	6.45	71.48	16.49	12.03	1.45022	San_Pedro	AF
C.6.2	20_50	4.87	0.73	1.25852	0.1	1058.61	0.25	258.47	166.58	29.1	73.35	0.9	150.04	150.04	3.87	69.56	10.72	19.72	1.56766	San_Pedro	Monocrop
C.3.2	20_50	5.12	0.47	0.81028	0.05	999.23	0.19	176.25	207.66	39.89	103.56	0.49	129.04	129.04	5.33	55.07	16.37	28.56	1.13421	San_Pedro	Monocrop
C.4.4	20_50	5.72	0.11	0.18964	0.03	378.1	0.11	187.17	133.15	21.84	57.7	0.27	60.6	60.6	2.61	16.61	12.03	71.36	0.662151	San_Pedro	Monocrop
C.4.6	20_50	6.23	0.22	0.37928	0.04	577.52	0.3	358.04	95.95	52.19	64.21	0.25	39.23	39.23	1.55	27.47	15.14	57.39	0.89012	San_Pedro	Monocrop
C.4.7	20_50	5.72	0.56	0.96544	0.07	1015.71	0.3	464.18	113.03	46.89	130.89	0.34	143.97	143.97	2.3	60.59	14.16	25.25	1.29156	San_Pedro	Monocrop
C.6.3	20_50	4.64	0.83	1.43092	0.12	1151.18	0.24	167.4	163.78	46.5		1.78	169.62	169.62	4.22	73.49	12.32	14.19	1.66754	San_Pedro	Monocrop
C.4.5	20_50	6.05	0.49	0.84476	0.08	1019.75	0.37	933.75	133.81	81.27	531.08	0.34	143.13	143.13	14.24	63.13	16.64	20.23	1.05899	San_Pedro	AF
A.1.2	20_50	5.56	0.81	1.39644	0.1	1400.51	0.43	681.76	68.46	71.6	93.68	0.4	193.68	193.68	5.7	68.08	12.29	19.63	1.73751	Duekoue	Monocrop
A.2.6	20_50	6.61	1.18	2.03432	0.16	1283.5	0.53	1463.92	103.49	107.33	139.38	0.57	140.25	140.25	8.05	80.81	10.68	8.51	2.22354	Duekoue	Monocrop
A.3.1	20_50	6.47	0.65	1.1206	0.08	1124.66	0.25	864.2	89.69	51.3	107.31	0.32	125.82	125.82	3.47	60.82	14.95	24.23	1.47895	Duekoue	AF
A.2.9	20_50	5.26	0.36	0.62064	0.04	830.17	0.17	226.05	174.93	22.04	82	0.57	89.84	89.84	2.58	40.6	19.14	40.26	1.0389	Duekoue	Monocrop
A.3.6	20_50	6.32	0.97	1.67228	0.09	939.24	0.35	781.88	109.92	69.84	147.31	0.33	65.45	65.45	5.27	47.17	19.35	33.48	2.51395	Duekoue	Monocrop
A.6.4	20_50	5.46	0.53	0.91372	0.05	779.38	0.2	208.08	174.77	43.52	79.01	0.73	72.25	72.25	1.93	40.04	18.36	41.6	1.56459	Duekoue	Monocrop
A.3.8	20_50	5.93	0.82	1.41368	0.12	1234.07	0.35	439.81	110.78	67.03	91.74	0.3	151.79	151.79	2.34	64.3	14.71	20.99	1.78924	Duekoue	AF
B.7.2	20_50	5.46	0.61	1.05164	0.09	959.96	0.25	188.82	188.85	5.76	78.44	0.42	116.41	116.41	1.06	54.12	15.34	30.54	1.51402	Guiglo	Monocrop
B.7.6	20_50	5.74	0.54	0.93096	0.07	786.05	0.29	359.29	204.57	50.95	70.84	0.42	82.13	82.13	2.8	46.1	15.45	38.45	1.51253	Guiglo	Monocrop
B.2.1	20_50	4.84	0.63	1.08612	0.06	1012.39	0.18	163.32	237.1		101.73	0.91	123.71	123.71	3.79	50.91	16.02	33.07	1.62277	Guiglo	Monocrop
B.2.6	20_50	5.31	0.89	1.53436	0.1	1076.07	0.25	287.64	158.04	22.01	127.72	0.71	168.61	168.61	1.68	58.47	17.87	23.66	2.0099	Guiglo	Monocrop
B.4.3	20_50	5.03	0.27	0.46548	0.02	632.13	0.16	55.07	111.31		36.63	0.51	89.53	89.53		30.33	10.85	58.82	1.13035	Guiglo	Monocrop
B.4.4	20_50	5.46	0.7	1.2068	0.07	760.43	0.23	339.37	118.2	44.97	141.32	0.42	107.5	107.5	2.45	49.05	19.11	31.84	1.77054	Guiglo	Monocrop
B.5.4	20_50	5.25	0.35	0.6034	0.03	573.84	0.14	216.57	123.35	5.61	62.33	0.3	77.41	77.41	3.91	29.19	19.28	51.53	1.24489	Guiglo	Monocrop
B.6.4	20_50	4.69	0.7	1.2068	0.07	927.66	0.24	187.57	202.3		78.87	0.78	96.38	96.38	4.59	47.64	14.03	38.33	1.95687	Guiglo	Monocrop
B.7.1	20_50	5.56	0.75	1.293	0.09	1067.94	0.25	412.61	174.7	47.66	84.25	0.39	145.53	145.53	5.83	65.46	12.38	22.16	1.6611	Guiglo	Monocrop
D.3.4	20_50	5.97	0.31	0.53444	0.02	334.59	0.1	454.24	136.91	25.07	71.8	0.22	49.05	49.05	5.4	14.29	10.07	75.64	2.19392	Oume	AF
D.4.2	20_50	5.84	0.58	0.99992	0.06	952.38	0.25	612.89	116.64	34.47	124.51	0.42	92.71	92.71	5.7	56.09	14.58	29.33	1.41491	Oume	AF
D.4.5	20_50	5.17	0.54	0.93096	0.06	1061.39	0.22	332.04	140.3	34.18	120.34	0.58	146.69	146.69	4.7	54.96	15.26	29.78	1.32578	Oume	AF
D.3.6	20_50	5.76	0.86	1.48264	0.08	1058.01	0.35	968.15	103.55	64.69	187.79	0.46	133.31	133.31	8.08	66.71	11.68	21.61	1.89136	Oume	AF
D.3.1	20_50	6.27	0.29	0.49996	0.02	300.49	0.12	360.89	72.21	3.46	65.36	0.22	37.3	37.3	3.22	13.44	7.42	79.14	2.39674	Oume	AF
D.1.3	20_50	6.38	0.29	0.49996	0.02	385.07	0.12	493.9	97.35	14.99	86.23	0.22	41.95	41.95	4.39	19.44	11.99	68.57	1.59071	Oume	AF
D.3.5	20_50	6.03	0.21	0.36204	0.02	282.76	0.09	285.36	107.3	65.19	62.78	0.26	43.2	43.2	4.33	9.62	8.98	81.4	1.94645	Oume	AF
A.2.4	20_50	8.36	2.09	3.60316	0.19	1268.81	0.66	5405.32	74.66	193.35	204.57	0.31	203.81	203.81	17.38	72.41	17.66	9.93	4.0004	Duekoue	AF
A.6.1	20_50	6.09	0.56	0.96544	0.05	667.06	0.23	480.28	125.3	36.36	111.04	0.38	39.26	39.26	6.35	35.92	12.76	51.32	1.98324	Duekoue	AF
A.2.7	20_50	6.27	1.44	2.48256	0.18	1276.24	0.6	901.28	112.27	322.2	184.19	0.35	253.67	253.67	9.15	79.31	13.31	7.38	2.68037	Duekoue	AF
A.3.5	20_50	5.73	0.56	0.96544	0.04	656.92	0.16	396.76	127.23	12.72	97.95	0.4	51.89	51.89	4.65	32.23	19.18	48.59	1.87792	Duekoue	AF
A.6.3	20_50	5.35	0.47	0.81028	0.06	1175.25	0.23	158.16	101.86	39.61	79.23	0.41	130.43	130.43	2.17	57.62	10.6	31.78	1.18775	Duekoue	AF
A.1.5	20_50	5.62	0.41	0.70684	0.05	906.19	0.17	343.08	51.45	21.07	82.33	0.53	97.32	97.32	0.07	42.77	19.49	37.74	1.1353	Duekoue	AF
B.4.7	20_50	5.92	0.93	1.60332	0.09	863.55	0.31	577.83	106.18	2.28	134.24	0.38	77.13	77.13	5.9	51.69	16.11	32.2	2.36478	Guiglo	AF
B.6.2	20_50	5.37	0.55	0.9482	0.07	1150.52	0.27	143.61	97.84	6.17	109.81	0.42	134.48	134.48	1.66	60.51	11.19	28.3	1.32245	Guiglo	AF
B.2.3	20_50	4.66	1.28	2.20672	0.14	1211.33	0.33	316.72	234.27	15.65	178.13	0.81	160.12	160.12	7.2	72.41	13.53	14.06	2.56774	Guiglo	AF
B.2.2	20_50	4.77	0.45	0.7758	0.06	991.61	0.23	192.4	180.21	21.43	84.54	0.65	112.21	112.21	1.94	56.64	12.65	30.71	1.11964	Guiglo	AF
B.6.5	20_50	5.04	0.87	1.49988	0.08	1000.22	0.25	385.74	101.57		125.17	0.47	91.14	91.14	4.62	60.48	10.36	29.16	2.11728	Guiglo	AF
B.6.7	20_50	5.27	0.84	1.44816	0.07	1004.86	0.27	643.92	173.15	7.66	121.4	0.37	94.48	94.48	7.22	58.76	13.25	27.99	2.01105	Guiglo	AF
B.4.1	20_50	5.26	0.61	1.05164	0.05	691.87	0.19	349.07	160.78		91.45	0.44	69.23	69.23	4.24	38.58	17.85	43.57	1.86362	Guiglo	AF
B.6.1	20_50	4.98	0.52	0.89648	0.06	1039.42	0.24	190.2	104.9		103.51	0.55	115.18	115.18	1.67	57.31	10.68	32.01	1.31855	Guiglo	AF
B.7.9	20_50	5.28	0.35	0.6034	0.05	831.4	0.18	60.91	202.32	60.22	57.86	0.67	112.92	112.92	0.57	45.49	15.39	39.12	0.99113	Guiglo	AF
D.3.2	20_50	5.71	0.92	1.58608	0.08	1080.87	0.28	888.66	103.91	47.29	184.75	0.43	115.25	115.25	6.28	65.68	12.8	21.52	2.021	Oume	AF
D.1.8	20_50	6.38	0.5	0.862	0.03	533.85	0.16	683.46	123.98	51	97.07	0.23	44.21	44.21	4.86	25.71	15.87	58.42	2.07311	Oume	AF
D.2.7	20_50	5.71	0.71	1.22404	0.06	1102.11	0.24	702.03	125	98.06	146.5	0.56	167.32	167.32	7.14	58.94	15.02	26.04	1.655	Oume	AF
D.1.5	20_50	5.5	0.14	0.24136	0.02	258.56	0.13	142.43	91.04	38.03	49.76	0.28	55.8	55.8	1.94	8.73	6.93	84.34	1.54125	Oume	AF
D.4.4	20_50	6.16	1.37	2.36188	0.14	909.3	0.45	1509.91	119.66	58.19	228.09	0.27	74.04	74.04	11.81	60.13	16.16	23.71	3.09592	Oume	AF
D.3.8	20_50	5.6	0.69	1.18956	0.07	1061.6	0.27	514	98.92	73.9	157.43	0.56	124.91	124.91	4.48	63.57	11.45	24.98	1.58566	Oume	AF
D.4.8	20_50	5.52	0.74	1.27576	0.07	1075.64	0.23	731.77	113.63	44.05	158.34	0.41	131.12	131.12	5.95	63.64	13.97	22.39	1.64381	Oume	AF
D.1.6	20_50	6.76	0.42	0.72408	0.04	525.09	0.19	769.99	125.64	23.13	110.96	0.24	39.14	39.14	5.6	24.56	19.33	56.11	1.64976	Oume	AF
D.2.4	20_50	5.5	0.64	1.10336	0.07	1187.77	0.35	731.49	79.06	192.71	157.1	0.75	150.62	150.62	8.37	67.95	8.86	23.19	1.43648	Oume	AF
D.4.3	20_50	6.22	0.84	1.44816	0.06	902.11	0.29	959.96	151.17	30.42	201.86	0.36	73.86	73.86	11.53	57.57	11.36	31.07	2.10091	Oume	AF
D.3.3	20_50	6.25	0.58	0.99992	0.06	681.49	0.25	488.21	86.62	13.72	124.84	0.44	56.08	56.08	4.09	42.36	17.96	39.68	1.65769	Oume	AF
D.1.4	20_50	6.18	0.2	0.3448	0.02	286.61	0.12	343.84	112.17	42.28	67.74	0.29	41.89	41.89	3.53	8.86	8.75	82.39	1.95798	Oume	AF
D.2.2	20_50	5.77	0.55	0.9482	0.05	1022.92	0.23	743.18	87.81	57.52	168.86	0.46	111.63	111.63	7.07	55.15	15.06	29.79	1.35052	Oume	AF
D.2.5	20_50	6.16	1	1.724	0.09	1078.17	0.34	906.39	105.72	137.41	185.83	0.48	106.98	106.98	8.3	60.74	13.82	25.44	2.31223	Oume	AF
D.3.9	20_50	5.66	0.18	0.31032	0.02	366.82	0.09	264.32	167.9	34.84	67.32	0.22	41.49	41.49	1.66	16.36	11.39	72.25	1.11827	Oume	AF
D.4.1	20_50	6.01	1.19	2.05156	0.12	896.8	0.42	1055.61	161.45	34.61	232.37	0.35	57.13	57.13	8.91	55.72	16.04	28.24	2.85892	Oume	AF
F.5.2	20_50	5.74	0.9	1.5516	0.11	1009.95	0.31	980.61	139	68.62	188.89	0.31	105.41	105.41	9.44	56.51	18.97	24.52	2.05564	Abengourou	AF
F.5.6	20_50	6.47	1.46	2.51704	0.16	1040.44	0.49	2326.27	110.57	88.97	255.07	0.27	87.34	87.34	15.01	59.21	19.59	21.2	3.19421	Abengourou	AF
F.1.2	20_50	6.58	0.51	0.87924	0.05	599.52	0.25	729.6	107.7	59.53	131.65	0.41	79.72	79.72	4.64	31.59	18.65	49.76	1.75008	Abengourou	AF
F.6.1	20_50	5.7	0.63	1.08612	0.08	824.21	0.24	560.23	172.31	82.97	144.76	0.43	123.84	123.84	6.35	51.2	20.81	27.99	1.50829	Abengourou	AF
F.1.3	20_50	5.38	0.83	1.43092	0.09	1115.07	0.28	727.13	151.51	56.65	147.3	0.4	130.77	130.77	5.77	59.6	19.18	21.22	1.81635	Abengourou	AF
F.5.3	20_50	5.92	1.7	2.9308	0.17	1163.96	0.52	1432.88	148.7	153.12	264.33	0.38	103.73	103.73	10.84	55.99	22.77	21.24	3.72118	Abengourou	AF
F.4.2	20_50	6.5	0.96	1.65504	0.12	1017.68	0.42	1306.53	144.39	60.52	187.35	0.38	70.26	70.26	9.59	54.24	15.66	30.1	2.36773	Abengourou	AF
F.1.1	20_50	5.63	1.54	2.65496	0.14	1139.9	0.45	1041.17	184.09	289.04	293.61	0.57	128.72	128.72	10.85	50.02	23.41	26.57	3.61563	Abengourou	AF
F.2.1	20_50	5.22	0.7	1.2068	0.1	1156.46	0.21	528.04	186.79	58.99	72.61	0.73	129.24	129.24	7.02	64.6	20	15.4	1.42648	Abengourou	AF
F.4.8	20_50	5.73	0.61	1.05164	0.08	855.13	0.26	990.68	119.22	53.59	173.96	0.41	105.88	105.88	9.81	55.15	17.18	27.67	1.45395	Abengourou	AF
F.6.5	20_50	6.94	0.95	1.6378	0.07	543.28	0.36	1036.02	194.02	95.01	127.07	0.4	48.38	48.38	6.8	27.54	21.86	50.6	3.31538	Abengourou	AF
E.2.9	20_50	5.93	0.27	0.46548	0.05	610.47	0.2	580.6	293.9	35.86	32.51	0.45	76.45	76.45	7.5	36.9	18.62	44.48	0.838401	Agboville	AF
E.2.2	20_50	6.16	0.28	0.48272	0.03	580.52	0.15	250.22	185.83	73.63	138.19	0.29	61.57	61.57	5.75	34.4	15.79	49.81	0.961785	Agboville	AF
E.4.6	20_50	6.09	0.64	1.10336	0.05	661.91	0.24	763.73	149.5	23.4	132.77	0.3	62.53	62.53	7.37	37.67	12.93	49.4	2.18055	Agboville	AF
E.1.7	20_50	5.83	1.16	1.99984	0.15	1030.9	0.39	460.08	181.68	51.47	420.04	0.37	183.73	183.73	10.79	66.26	17.43	16.31	2.38958	Agboville	AF
E.1.4	20_50	5.09	0.65	1.1206	0.07	1048.23	0.13	57.33	267.98	29.45	43.46	0.77	149.41	149.41	4.76	57.57	19.21	23.22	1.45949	Agboville	AF
E.3.6	20_50	5.71	1.19	2.05156	0.08	870.62	0.29	1467.32	140.51	12.35	136.66	0.47	83.38	83.38	12.59	52.71	12.29	35	3.15625	Agboville	AF
E.2.6	20_50	6.4	0.12	0.20688	0.03	330.28	0.11	437.76	127.3	28.46	32.01	0.31	45.49	45.49	7.13	15.95	15.73	68.32	0.65303	Agboville	AF
E.2.1	20_50	6.12	0.81	1.39644	0.09	678.35	0.3	851.68	141.68	81.22	103.07	0.28	57.84	57.84	6.87	44.41	21.12	34.47	2.13099	Agboville	AF
E.1.1	20_50	5.34	0.31	0.53444	0.04	449.72	0.11	303.39	166.57			0.37	96.43	96.43	1.64	18.92	20.87	60.21	1.34315	Agboville	AF
E.2.3	20_50	6.11	0.84	1.44816	0.11	856.96	0.35	907.51	140.23	81.93	184.09	0.47	73.42	73.42	8.97	53.16	19.3	27.54	1.99856	Agboville	AF
E.1.9	20_50	5.02	0.31	0.53444	0.04	554.62	0.1	202.32	163.3			0.69	105.44	105.44	0.41	26.98	22.32	50.7	1.08406	Agboville	AF
E.2.8	20_50	5.83	0.49	0.84476	0.07	693.28	0.24	685.46	278.18	60.81	38.05	0.45	73.74	73.74	6.89	41.59	22.03	36.38	1.32782	Agboville	AF
E.2.7	20_50	6.04	0.53	0.91372	0.08	748.64	0.3	943.8	325.41	56.48	31.46	0.42	58.9	58.9	9.6	41.94	22.1	35.96	1.4268	Agboville	AF
E.1.2	20_50	5.36	0.68	1.17232	0.06	537.97	0.18	336.7	213.94	27.51	5.15	0.78	65.64	65.64	2.64	22.9	23.91	53.19	2.50442	Agboville	AF
C.5.2	20_50	4.97	0.78	1.34472	0.07	982.99	0.19	383.79	205.2		153.48	0.64	140.42	140.42	5.8	61.95	14.54	23.51	1.75803	San_Pedro	AF
C.2.2	20_50	4.84	0.76	1.31024	0.06	1100.95	0.16	116.07	259.56	31.28	123.25	0.84	133.06	133.06	7.59	59.99	16.8	23.21	1.70626	San_Pedro	AF
C.6.5	20_50	4.7	1.25	2.155	0.13	1145.33	0.22	68.51	230.5	91.33	35.47	1.78	175.78	175.78	5.13	70.52	10.49	18.99	2.66017	San_Pedro	AF
A.1.9	20_50	5.04	0.72	1.24128	0.08	1322.15	0.21	212.91	106.07	82.41	99.77	0.75	169.89	169.89	1.7	63.33	15.42	21.25	1.57623	Duekoue	AF
A.3.4	20_50	6.66	0.63	1.08612	0.06	988.06	0.26	675.9	71.02	81.79	118.39	0.39	72.15	72.15	4.97	49	15.99	35.01	1.67121	Duekoue	AF
A.6.2	20_50	6.5	0.76	1.31024	0.07	1051.86	0.28	686.45	71.65	72.17	107.22	0.42	65.45	65.45	5.27	45.85	17.4	36.75	2.07153	Duekoue	AF
A.5.3	20_50	5.87	0.89	1.53436	0.14	1195.74	0.33	737.42	114.49	123.15	137.42	0.44	130.68	130.68	4.37	66.27	15.97	17.76	1.86571	Duekoue	AF
A.2.5	20_50	5.58	0.69	1.18956	0.11	1183.19	0.31	348.28	93.15	21.35	128.57	0.41	109.61	109.61	4.22	67.05	12.86	20.09	1.48862	Duekoue	AF
A.6.5	20_50	5.39	0.43	0.74132	0.06	1181.71	0.25	56.83	99.34	6.18	77.87	0.46	105.03	105.03	0.04	57.84	11.64	30.52	1.06695	Duekoue	AF
A.4.4	20_50	5.7	1.41	2.43084	0.17	1338.92	0.53	1211.76	80.95	204.03	17.68	0.33	258.41	258.41	8.63	74.74	16.9	8.36	2.6526	Duekoue	AF
A.2.1	20_50	5.79	0.91	1.56884	0.1	1176.41	0.38	606.63	101.61	63.13	107.07	0.38	97.27	97.27	7.24	63.01	12.76	24.23	2.07053	Duekoue	AF
A.5.1	20_50	5.87	1.09	1.87916	0.15	1286.01	0.45	870.95	84.38	140.08	147.62	0.26	174.08	174.08	7.82	75.44	11.96	12.6	2.15007	Duekoue	AF
A.1.3	20_50	5.84	0.65	1.1206	0.09	1288.01	0.29	450.54	83.07	104.28	99.02	0.35	178.11	178.11	2.99	65.22	14.07	20.71	1.41329	Duekoue	AF
A.6.7	20_50	5.34	0.67	1.15508	0.06	1103.14	0.23	272.6	100.85	0.04	86.33	0.44	112.37	112.37	3.32	57.31	11.76	30.93	1.67233	Duekoue	AF
A.2.3	20_50	5.35	0.79	1.36196	0.11	1208.72	0.26	270.65	122.95	20.47	110.46	0.65	100.42	100.42	1.19	53.71	19.34	26.95	1.86442	Duekoue	AF
A.5.2	20_50	5.46	0.79	1.36196	0.11	1265.35	0.29	442.46	88.7	62.39	171.41	0.36	171.7	171.7	2.42	71.69	11.99	16.32	1.62758	Duekoue	AF
A.1.4	20_50	5.25	0.6	1.0344	0.07	1283.11	0.22	225.69	73.61	80.77	104.16	0.49	138.65	138.65	1.67	54.18	17.32	28.5	1.44671	Duekoue	AF
A.5.5	20_50	6.01	0.75	1.293	0.08	1291.06	0.31	547.81	91.59	107.23	62.08	0.38	122.42	122.42	4.14	63.05	14.25	22.7	1.6727	Duekoue	AF
A.2.2	20_50	5.7	0.91	1.56884	0.1	1163.21	0.3	494.16	95.87	29.98	119.65	0.44	90.08	90.08	4.26	57.52	16.36	26.12	2.1235	Duekoue	AF
A.5.7	20_50	6.07	1.73	2.98252	0.2	1178.24	0.61	1746.41	112.77	115.5	262.57	0.24	128.05	128.05	11.45	71.62	16.34	12.04	3.39077	Duekoue	AF
A.6.8	20_50	6.12	0.82	1.41368	0.08	1104.75	0.39	749.76	77.6	0.5	114.11	0.36	64.38	64.38	8.28	55.78	12.29	31.93	2.0768	Duekoue	AF
A.6.6	20_50	5.29	0.49	0.84476	0.06	1187.73	0.26	184.01	113.45		83.01	0.47	107.94	107.94	1.49	58.69	11.14	30.17	1.20974	Duekoue	AF
A.1.1	20_50	5.37	0.56	0.96544	0.07	1260.82	0.21	431.35	86.96	33.45	102.63	0.48	136	136	3.48	60.71	15.56	23.73	1.26582	Duekoue	AF
A.5.4	20_50	5.06	0.68	1.17232	0.11	1104.06	0.26	180.37	180.26	64.34	89.98	0.85	162.42	162.42		65.29	13.33	21.38	1.49112	Duekoue	AF
A.4.2	20_50	5.88	0.81	1.39644	0.11	1267.9	0.36	821.49	96.43	119.3	99.58	0.49	149.09	149.09	5.54	73.62	9.72	16.66	1.67559	Duekoue	AF
A.4.5	20_50	5.02	0.68	1.17232	0.09	1225.1	0.27	255.54	86.81	96.79	116.11	0.74	183.43	183.43	0.67	70.15	12.28	17.57	1.4222	Duekoue	AF
B.5.5	20_50	6.57	1	1.724	0.07	581.57	0.37	967.47	127.51	33.18	104.19	0.41	42.14	42.14	7.8	28.75	19.57	51.68	3.56788	Guiglo	AF
B.2.7	20_50	5.46	0.85	1.4654	0.09	843.08	0.31	352.43	160.77	25.93	129.22	0.36	80.05	80.05	5.04	50.54	18.98	30.48	2.10788	Guiglo	AF
B.2.9	20_50	5.5	0.85	1.4654	0.11	789.33	0.28	461.64	160.19	48.75	150.4	0.48	65.45	65.45	4.06	45.26	23.54	31.2	2.12994	Guiglo	AF
B.6.3	20_50	4.76	0.79	1.36196	0.08	1040.96	0.21	129.1	242.08		98.72	0.58	129.09	129.09	1.36	57.78	12.71	29.51	1.93213	Guiglo	AF
B.6.8	20_50	5.27	0.47	0.81028	0.06	1217	0.21	231.33	87.74	0.45	79.63	0.38	148.32	148.32	1.26	62.37	13.54	24.09	1.06742	Guiglo	AF
B.7.3	20_50	5.28	0.58	0.99992	0.09	1013.63	0.22	133.85	148.25		76.6	0.46	134.16	134.16		57.26	15.08	27.66	1.38225	Guiglo	AF
B.4.2	20_50	5.25	1.11	1.91364	0.12	1090.54	0.26	402.62	195.85	79.18	178.58	0.62	160.94	160.94	4.03	60.04	18.89	21.07	2.42448	Guiglo	AF
B.4.6	20_50	5.11	0.79	1.36196	0.07	791.24	0.21	314.45	180.76		102.83	0.5	96.97	96.97	3.55	45.09	19.16	35.75	2.11978	Guiglo	AF
B.2.4	20_50	5.18	0.94	1.62056	0.1	980.29	0.24	304.38	172.1	1.91	130.77	0.54	95.15	95.15	3.85	52.76	22.28	24.96	2.15959	Guiglo	AF
B.5.6	20_50	4.86	0.38	0.65512	0.03	745.4	0.16	112.59	158.94		49.63	0.72	120.12	120.12	4.83	35.74	15.89	48.37	1.26887	Guiglo	AF
B.5.2	20_50	5.21	0.31	0.53444	0.04	581.56	0.14	191.07	150.24	33.39	70.67	0.44	88.29	88.29	2.83	30.5	19.2	50.3	1.07533	Guiglo	AF
B.7.5	20_50	5.4	0.64	1.10336	0.08	1131.11	0.26	454.13	135.08	12.79	109.48	0.36	131.66	131.66	5.81	64.31	11.72	23.97	1.45122	Guiglo	AF
B.5.3	20_50	4.89	0.4	0.6896	0.05	651.44	0.17	155.94	184.05	33.05	56.6	0.55	110.32	110.32	2.26	35.66	19.41	44.93	1.25222	Guiglo	AF
D.3.7	20_50	5.88	0.29	0.49996	0.02	321.19	0.09	286.17	105.52	36.38	68.33	0.2	40.21	40.21	3.83	13.86	11.92	74.22	1.93933	Oume	Fallow
D.4.9	20_50	6.51	2.17	3.74108	0.21	1041.64	0.62	2548.74	87.54	229.21	391.56	0.25	111.25	111.25	15.13	67.12	16.43	16.45	4.47765	Oume	Fallow
D.4.7	20_50	5.43	0.3	0.5172	0.02	313.85	0.08	160.72	132.73		55.74	0.22	49.9	49.9	2.94	13.91	11.62	74.47	2.02585	Oume	Fallow
D.5.4	20_50	7.47	0.84	1.44816	0.07	927.69	0.37	1594.56	96.82	158.28	177.64	0.44	74.04	74.04	11.89	57.65	11.22	31.13	2.10274	Oume	Fallow
D.2.9	20_50	5.66	0.82	1.41368	0.08	1105.29	0.38	869.36	112.1	146.58	67.98	0.57	121.62	121.62	7.37	66.09	10.53	23.38	1.84505	Oume	Fallow
D.5.6	20_50	7.39	0.9	1.5516	0.08	858.37	0.4	1189.81	119.18	111.59	169.25	0.4	68.09	68.09	7.41	54.22	11.73	34.05	2.35269	Oume	Fallow
D.4.6	20_50	5.48	0.44	0.75856	0.04	658.11	0.17	322.77	131.81		77.9	0.49	72.24	72.24	4	36.47	18.49	45.04	1.3802	Oume	Fallow
D.5.1	20_50	7.34	0.89	1.53436	0.08	957.32	0.34	1154.54	100.68	99.55	174.95	0.39	100.78	100.78	10.31	59.8	12.22	27.98	2.13046	Oume	Fallow
D.5.5	20_50	6.53	0.7	1.2068	0.06	965.28	0.29	792.88	96.44	93.02	154.21	0.39	112.88	112.88	8.23	59.18	10.65	30.17	1.7282	Oume	Fallow
F.6.7	20_50	5.1	1.12	1.93088	0.12	1038.17	0.23	662.08	194.46	33.12	145.63	0.47	128.76	128.76	6.01	57.67	21.11	21.22	2.45098	Abengourou	Fallow
F.6.9	20_50	6.4	0.26	0.44824	0.03	374.41	0.13	477.69	133.07	28.7	121.94	0.28	61.27	61.27	2.12	18.56	19.52	61.92	1.1771	Abengourou	Fallow
F.1.5	20_50	5.38	0.05	0.0862	0.02	369.41	0.1	149.35	117.42		22.36	0.32	72.89	72.89	0.98	17.25	9.34	73.41	0.324182	Abengourou	Fallow
F.1.6	20_50	5.76	0.91	1.56884	0.11	1070.32	0.31	1051.06	130.65	76.04	161.94	0.31	114.5	114.5	9.73	61.16	16.93	21.91	2.00902	Abengourou	Fallow
F.1.9	20_50	7.15	0.23	0.39652	0.03	446.4	0.21	727.72	163.8	112.3	170.99	0.34	34.32	34.32	5.26	26.84	15.8	57.36	0.929925	Abengourou	Fallow
F.2.8	20_50	5.71	1.1	1.8964	0.14	1109.72	0.43	1369.77	117.41	99.41	203.07	0.38	120.59	120.59	11.78	67.03	14.51	18.46	2.32573	Abengourou	Fallow
F.3.9	20_50	5.66	0.72	1.24128	0.09	852.56	0.24	582.96	177.08	96.65	118.61	0.4	118.17	118.17	5.78	51.6	22.17	26.23	1.68264	Abengourou	Fallow
F.6.6	20_50	6.84	0.33	0.56892	0.04	512.2	0.2	769.71	178.87	57.64	149.1	0.31	69.17	69.17	6.12	29.08	18.5	52.42	1.19571	Abengourou	Fallow
E.2.4	20_50	6.05	0.58	0.99992	0.08	690.27	0.31	595.4	88.67	83.7	114.47	0.49	39.45	39.45	6.01	41.87	19.29	38.84	1.63492	Agboville	Fallow
E.4.2	20_50	6.08	1.44	2.48256	0.12	878.92	0.45	1871.67	167.32	46.07	301.31	0.3	69.06	69.06	14.36	57.94	17.13	24.93	3.30699	Agboville	Fallow
E.4.3	20_50	8.08	1.84	3.17216	0.12	791.69	0.61	4250.29	168	155.03	281.91	0.35	53.14	53.14	17.52	47.83	19.95	32.22	4.68008	Agboville	Fallow
E.4.8	20_50	5.3	0.59	1.01716	0.06	633.54	0.21	384.43	228	49.77	88.39	0.52	77.58	77.58	4.3	38.75	20.25	41	1.724	Agboville	Fallow
E.4.9	20_50	5.53	1.02	1.75848	0.08	624.31	0.34	637.68	220.58	63.79	110.85	0.57	52.37	52.37	6.68	31.48	17.72	50.8	3.57415	Agboville	Fallow
C.3.5	20_50	4.74	0.89	1.53436	0.09	1178.03	0.22		202.97		114.39	0.91	189.06	189.06	6.57	67.78	17.55	14.67	1.79815	San_Pedro	Fallow
C.6.8	20_50	4.82	1.2	2.0688	0.13	1131.85	0.33	294.08	188.74	27.79	69.91	1.1	132.07	132.07	3.28	75.69	10.87	13.44	2.39002	San_Pedro	Fallow
C.2.5	20_50	5.27	0.43	0.74132	0.04	744.47	0.21	82.01	194.38	79.52	60.21	0.44	76.76	76.76	4.18	41.89	15.75	42.36	1.28612	San_Pedro	Fallow
C.2.3	20_50	5.06	0.32	0.55168	0.04	719.62	0.22	102.53	201.31	9.25	41.24	0.35	63.54	63.54	0.45	33.71	18.66	47.63	1.05343	San_Pedro	Fallow
C.5.4	20_50	5	0.59	1.01716	0.07	1172.05	0.19	300.95	283.13	7.8	116.56	0.9	107.29	107.29	8.7	60.4	18.69	20.91	1.28608	San_Pedro	Fallow
C.5.3	20_50	5	0.83	1.43092	0.05	731.65	0.16	183.65	205.97		128.39	0.7	105.85	105.85	3.61	40.71	20.08	39.21	2.35387	San_Pedro	Fallow
A.4.3	20_50	6	1.06	1.82744	0.14	1277.26	0.42	741.07	65.82	177.59	124.23	0.39	170.04	170.04	6.1	73.44	11.24	15.32	2.15805	Duekoue	Fallow
A.1.7	20_50	5.43	0.74	1.27576	0.1	1358.38	0.29	404.61	120.04	59.02	77.57	0.43	184.06	184.06	2.79	68.61	13.27	18.12	1.55809	Duekoue	Fallow
B.7.7	20_50	5.7	0.9	1.5516	0.08	838.03	0.28	358.41	191.54	79.4	87.85	0.41	85.61	85.61	2.22	51.78	14.2	34.02	2.35162	Guiglo	Fallow
B.3.9	20_50	5.16	0.22	0.37928	0.03	612.8	0.15	134.7	149.69	14.2	57.94	0.47	73.58	73.58	3.27	30.34	15.81	53.85	0.821842	Guiglo	Fallow
B.6.9	20_50	4.95	0.5	0.862	0.04	787.52	0.19	179.51	204.88		80.9	0.59	105.2	105.2	3.18	40.26	14.26	45.48	1.58107	Guiglo	Fallow
B.7.4	20_50	4.98	0.31	0.53444	0.03	426.64	0.1	25.42	180.39	11.56	47.93	0.34	79.8	79.8	1.43	21.01	17.22	61.77	1.39796	Guiglo	Fallow

## Sheet: 0-20
Plot ID	pH	SOC	SOM	TN	m3Al	m3B	m3Ca	m3Fe	m3K	m3Mg	ExAc	PSI	CEC	Clay	Silt	Sand	SSSI	Zone_name	SAF_ID4
F.2.2	5.9	1.34	2.31016	0.14	970.67	0.42	1078.42	145.36	105.94	193.99	0.36	87.75	11.3	53.39	22.53	24.08	3.04289	Abengourou	Monocrop
F.2.3	6.05	1.34	2.31016	0.14	961.91	0.36	1548.15	146.33	56.73	213.32	0.33	92.13	11.71	56.93	21.09	21.98	2.96098	Abengourou	Monocrop
F.2.4	5.32	1.3	2.2412	0.13	1160.05	0.35	782.23	151.21	135.85	154.21	0.55	166.45	9.57	62.51	19.69	17.8	2.72652	Abengourou	Monocrop
F.3.1	6.49	1.51	2.60324	0.15	1000.95	0.47	1531.81	111.65	196.61	218.58	0.31	81.36	10.76	53.89	22.55	23.56	3.4056	Abengourou	Monocrop
F.3.4	6.4	1.48	2.55152	0.16	995.73	0.45	1744.45	133.39	136.25	235.3	0.33	69.57	10.8	53.36	24.06	22.58	3.29569	Abengourou	Monocrop
F.3.8	5.93	1.77	3.05148	0.16	1065.91	0.45	1704.13	104.61	119.33	239.1	0.28	73.68	13.2	53.69	22.92	23.39	3.98314	Abengourou	Monocrop
F.5.1	5.43	1.61	2.77564	0.15	1142.88	0.44	1010.79	160.75	87.52	196.22	0.41	122.81	12.67	58.52	20.69	20.79	3.50415	Abengourou	Monocrop
F.1.4	5.44	1.05	1.8102	0.12	1158.61	0.3	930.57	153.42	73.95	191.21	0.37	135.36	9.31	62	18.52	19.48	2.24814	Abengourou	Monocrop
F.3.2	6.18	1.19	2.05156	0.14	885.94	0.43	1044.65	135.75	135.42	224.3	0.34	62.32	6.7	46.5	23.72	29.78	2.92162	Abengourou	Monocrop
F.6.2	6.22	0.17	0.29308	0.03	532.39	0.17	436.7	163.32	30.3	67.78	0.34	69.89	2.1	29.13	16.42	54.45	0.643425	Abengourou	Monocrop
F.6.3	5.75	1.2	2.0688	0.13	851.84	0.45	746.31	101.5	45.43	196.12	0.42	83.4	7.36	43.56	23.27	33.17	3.09562	Abengourou	Monocrop
E.3.1	6.3	1	1.724	0.07	672.76	0.36	1072.16	132.19	16.66	160.49	0.32	54.16	8.06	38.76	16.06	45.18	3.14484	Agboville	Monocrop
E.3.3	6.01	0.72	1.24128	0.04	517.83	0.21	547	144.5	44.99	98.86	0.29	37	6.15	27.82	12.91	59.27	3.04758	Agboville	Monocrop
E.3.5	6.08	0.99	1.70676	0.06	679.79	0.3	1067.18	194.74	52.94	141.48	0.36	44.6	9.07	38.83	13.77	47.4	3.24479	Agboville	Monocrop
E.4.7	6.58	1.47	2.53428	0.11	714.27	0.51	1718.27	155.99	66.06	172.76	0.38	35.61	11.23	39.18	16.11	44.71	4.58361	Agboville	Monocrop
E.4.5	5.82	1.52	2.62048	0.11	793.71	0.42	1372.59	220.9	63.85	183.76	0.44	61.66	11.91	47.78	13.66	38.56	4.2651	Agboville	Monocrop
E.4.1	6.54	1.75	3.017	0.13	960.61	0.5	2629.23	129.89	85.59	353.4	0.35	73.52	19.16	61.78	13.9	24.32	3.98652	Agboville	Monocrop
C.2.4	5.6	1.12	1.93088	0.13	934.92	0.42	523.46	167.66	40.51	194.56	0.64	95.12	6.64	63.19	13.3	23.51	2.52436	San_Pedro	Monocrop
C.2.6	5.05	0.8	1.3792	0.08	895.24	0.27	181.56	217.4	6.86	99.96	0.49	101.38	3.5	57.88	13.28	28.84	1.93817	San_Pedro	Monocrop
C.3.3	5.31	0.59	1.01716	0.07	998.01	0.32		111.42	68.05	140.23	0.76	139.51	5.08	65.71	13.79	20.5	1.27945	San_Pedro	Monocrop
C.3.4	5.43	1.06	1.82744	0.1	929.63	0.36	233.4	139.82	54.33	120.39	0.66	97.83	3.87	60.49	15.09	24.42	2.41789	San_Pedro	Monocrop
C.4.1	6.32	0.97	1.67228	0.11	775.43	0.57	980.65	134.38	69.55	140.23	0.26	36.15	7.44	29.97	22.19	47.84	3.20606	San_Pedro	Monocrop
C.4.3	6.61	0.81	1.39644	0.11	745.52	0.51	1017.35	94.46	84.28	135.99	0.26	34.2	7.83	29.52	19.78	50.7	2.83254	San_Pedro	Monocrop
C.4.9	6.42	0.7	1.2068	0.08	609.69	0.36	663.48	112.06	107.68	101.15	0.26	30.16	5.06	28.88	20.35	50.77	2.45135	San_Pedro	Monocrop
C.6.9	5.3	0.35	0.6034	0.03	451.12	0.13	68.64	178.84	24.04	48.87	0.45	55.19	2.29	21.36	16.11	62.53	1.61035	San_Pedro	Monocrop
C.3.1	4.6	1.3	2.2412	0.12	1310.64	0.18		264.62		162.59	1.23	194.97	10.71	69.9	17.93	12.17	2.55175	San_Pedro	AF
C.6.2	5.1	1.24	2.13776	0.11	1004.85	0.31	393.58	205.35	32	93.71	0.56	85.53	3.8	60.76	13.97	25.27	2.86064	San_Pedro	Monocrop
C.3.2	5.29	0.83	1.43092	0.06	906.74	0.23	223.51	250.94	40.99	111.24	0.42	97.7	6.4	48.91	19.03	32.06	2.10615	San_Pedro	Monocrop
C.4.4	5.84	0.5	0.862	0.04	429.22	0.13	270.57	189.07	69.01	71.71	0.27	51.09	3.97	17.82	16.67	65.51	2.49928	San_Pedro	Monocrop
C.4.6	6.55	0.59	1.01716	0.06	569.18	0.35	685.35	102.42	81.89	76.93	0.23	27.31	4.01	26.47	19.46	54.07	2.21459	San_Pedro	Monocrop
C.4.7	5.75	0.86	1.48264	0.09	941.86	0.34	484.04	110.09	90.66	168.19	0.31	69.82	6.34	44.3	21.38	34.32	2.25737	San_Pedro	Monocrop
C.6.3	5.09	0.73	1.25852	0.09	1079.31	0.24		111.15	53.48	31.32	0.97	202.78	2.92	70.58	7.8	21.62	1.60566	San_Pedro	Monocrop
C.4.5	6.12	1.18	2.03432	0.15	993.8	0.51	1177.91	149.5	89.18	422.14	0.27	70.78	15.16	49.99	22.76	27.25	2.79632	San_Pedro	AF
A.1.2	6.34	1.75	3.017	0.15	1352.72	0.6	1438.82	70.98	304.83	146.81	0.39	122.07	11.11	63.17	14.34	22.49	3.8924	Duekoue	Monocrop
A.2.6	7.14	2.41	4.15484	0.26	1179.72	0.75	3353.53	84.62	156.14	363.2	0.27	141.8	17.72	75.57	14.33	10.1	4.62162	Duekoue	Monocrop
A.3.1	6.61	1.22	2.10328	0.11	947.01	0.44	1012.51	109.01	94.89	133.18	0.3	47.4	6.9	44.79	19.28	35.93	3.28278	Duekoue	AF
A.2.9	5.19	0.52	0.89648	0.04	581.57	0.13	172.27	218.07	29.85	67.79	0.4	72.19	2.49	29.37	20.35	50.28	1.80306	Duekoue	Monocrop
A.3.6	6.5	1.43	2.46532	0.13	896.79	0.46	1205.42	101.21	133.74	163.07	0.35	46.93	7.01	41.5	22.15	36.35	3.87324	Duekoue	Monocrop
A.6.4	5.55	0.93	1.60332	0.06	628.83	0.23	423.98	187.95	27.4	87.32	0.44	36.54	4.48	31.55	20.41	48.04	3.08568	Duekoue	Monocrop
A.3.8	6.07	1.31	2.25844	0.15	1189.19	0.43	647.78	118.15	127.71	109.18	0.31	96.28	6.28	54.53	20.15	25.32	3.02416	Duekoue	AF
B.7.2	5.48	1.01	1.74124	0.09	896.65	0.31	266.86	251.88	67.93	88.14	0.41	82.34	3.66	47.59	17.14	35.27	2.69	Guiglo	Monocrop
B.7.6	5.74	1.11	1.91364	0.09	787.87	0.42	544.02	191.06	64.08	84.96	0.44	52.97	4.02	42.42	15.49	42.09	3.30451	Guiglo	Monocrop
B.2.1	4.78	1	1.724	0.08	941.02	0.2	65.18	345.8	11.83	98.45	0.97	92.68	4.72	40.77	19.48	39.75	2.86141	Guiglo	Monocrop
B.2.6	4.87	1.35	2.3274	0.14	1089.66	0.28	106.71	268.65	9.21	131.43	0.91	129.27	4.75	58.86	16.87	24.27	3.07329	Guiglo	Monocrop
B.4.3	5.17	0.49	0.84476	0.03	401.3	0.11	193.98	136.44	14.66	63.81	0.24	56.78	3.98	20.82	14.47	64.71	2.39377	Guiglo	Monocrop
B.4.4	5.59	0.9	1.5516	0.08	594.44	0.27	573.6	173.51	27.73	146.18	0.32	61.53	3.94	39.55	22.47	37.98	2.50177	Guiglo	Monocrop
B.5.4	5.45	0.65	1.1206	0.04	506.53	0.16	369.11	134.53	19.96	78.86	0.29	47.93	4.58	25.91	19.68	54.41	2.458	Guiglo	Monocrop
B.6.4	4.91	0.76	1.31024	0.07	821.79	0.26	151.36	189.47	27.89	87.12	0.84	66.63	3.38	40.22	16.71	43.07	2.30149	Guiglo	Monocrop
B.7.1	5.48	1.13	1.94812	0.12	1021.74	0.34	518.27	216.48	63.86	110.42	0.35	87.7	5.22	56.1	15.94	27.96	2.70422	Guiglo	Monocrop
D.3.4	6.14	1.03	1.77572	0.06	467.32	0.3	1039.7	170.54	63.93	124.41	0.3	34.65	11.44	22.45	17.34	60.21	4.46273	Oume	AF
D.4.2	6.1	0.86	1.48264	0.06	684.72	0.29	680.33	149.24	9.2	152.99	0.32	51.06	6.65	38.92	17.78	43.3	2.61489	Oume	AF
D.4.5	5.41	0.54	0.93096	0.04	620.97	0.16	239.09	145.57		88.45	0.37	54.16	2.27	31.8	17.72	50.48	1.87997	Oume	AF
D.3.6	5.85	1.24	2.13776	0.11	914.31	0.41	781.63	116.04	16.08	203.86	0.36	79.26	8.28	59.56	11.75	28.69	2.99784	Oume	AF
D.3.1	6.25	0.62	1.06888	0.04	350.51	0.16	526.96	95.76	29.75	78.71	0.29	37.3	3.5	19.68	14.53	65.79	3.12447	Oume	AF
D.1.3	7.31	0.82	1.41368	0.05	427.9	0.28	1008.02	104.74	83.79	115.83	0.27	30.25	6.13	22.47	16.31	61.22	3.64538	Oume	AF
D.3.5	5.99	0.59	1.01716	0.04	344.91	0.18	552.49	114.42	21.09	83	0.26	28.01	5.86	15.89	13.74	70.37	3.43287	Oume	AF
F.2.5	5.26	1	1.724	0.11	886.27	0.3	608.59	226.39	88.72	126.18	0.39	101.56	8.33	55.63	19.55	24.82	2.29316	Abengourou	AF
F.3.7	6.02	1.66	2.86184	0.15	938.63	0.43	1714.36	114.69	108.46	213.5	0.26	76.61	12.3	56.17	21.1	22.73	3.70369	Abengourou	AF
F.3.5	6.66	0.97	1.67228	0.07	530.33	0.28	948	200.85	87.95	120.45	0.32	43.09	4.32	29.11	21.05	49.84	3.33389	Abengourou	AF
F.3.6	5.68	0.52	0.89648	0.05	571.12	0.2	460.81	158.06	29.37	89.53	0.42	70.14	2.88	29.62	21.49	48.89	1.75402	Abengourou	AF
F.4.5	6.41	1.31	2.25844	0.09	729.53	0.4	1291.54	154.98	39.75	162.13	0.31	38	9.83	37.85	19.7	42.45	3.92431	Abengourou	AF
F.3.3	7.08	0.62	1.06888	0.05	473.36	0.25	1066.37	118.02	50.38	87.54	0.29	33.27	5	25.01	20.75	54.24	2.33584	Abengourou	AF
F.5.8	4.97	1.34	2.31016	0.14	1085.26	0.33	757.06	226.59	86.45	154.82	0.75	116.1	11.33	58.97	19.64	21.39	2.93876	Abengourou	AF
F.6.4	5.96	1.39	2.39636	0.14	907.15	0.4	1107.87	142.08	69.47	239.7	0.35	71.93	9.42	51.52	23.32	25.16	3.20198	Abengourou	AF
F.4.3	5.22	0.8	1.3792	0.06	642.12	0.17	351.93	248.03	59.82	82.8	0.51	76.46	6.03	31.24	21.41	47.35	2.61956	Abengourou	AF
E.1.8	5.82	0.69	1.18956	0.05	413.42	0.17	600.01	200.92	39.53	43.25	0.44	72.88	5.17	18.96	21.72	59.32	2.92419	Agboville	AF
E.3.4	8.62	2.12	3.65488	0.1	729.16	0.6	4859.52	132.87	161.32	220.84	0.36	41.32	22.35	45.6	16.39	38.01	5.89592	Agboville	AF
E.2.5	5.76	1.29	2.22396	0.14	817.44	0.39	872.37	230.21	53.43	99.36	0.31	63.29	9.28	45.98	22.7	31.32	3.23815	Agboville	AF
E.3.2	5.83	0.69	1.18956	0.04	538.1	0.19	457.65	228.63	55.62	116.68	0.3	52.83	5.39	29.71	15	55.29	2.66061	Agboville	AF
E.3.8	6.11	1.25	2.155	0.09	704.51	0.42	1327.67	172.96	26.43	150.26	0.36	52.53	10.19	41.73	13.53	44.74	3.89975	Agboville	AF
E.3.7	6.05	0.94	1.62056	0.06	570.63	0.25	834.76	161.82	32.3	108.13	0.33	40.2	6.28	30.56	17.69	51.75	3.35867	Agboville	AF
E.4.4	6.13	0.98	1.68952	0.08	710.17	0.35	927.88	175.77	74.56	155.51	0.5	55.76	9.04	40.77	16.06	43.17	2.97294	Agboville	AF
E.1.6	6.34	0.89	1.53436	0.05	445.56	0.24	853.88	219.54	67.34	156.33	0.29	62.25	6.79	21.52	21.21	57.27	3.59083	Agboville	AF
C.6.1	5	0.86	1.48264	0.08	966.99	0.24	246.62	150.63	20.4	86.43	0.61	103.99	2.51	57.25	12.41	30.34	2.1284	San_Pedro	AF
C.3.7	4.91	0.68	1.17232	0.1	1071.19	0.29		119.92	59.68	233.05	1.18	156.01	9.23	71.08	10.36	18.56	1.43949	San_Pedro	AF
C.2.8	5.45	1.06	1.82744	0.07	799.51	0.24	278.91	317.55	62.56	101.4	0.37	70.84	8.65	43.63	19.38	36.99	2.90024	San_Pedro	AF
C.6.7	4.88	0.88	1.51712	0.05	653.19	0.16	90.66	253.58	29.35	62.58	0.55	83.57	2.46	32.05	20.11	47.84	2.90859	San_Pedro	AF
C.4.8	5.94	1.48	2.55152	0.16	899.19	0.49	694.12	137.8	91.04	207.46	0.4	87.79	8.51	59.5	15.49	25.01	3.40248	San_Pedro	AF
C.5.1	5	0.61	1.05164	0.04	648.99	0.12	80.16	145.92	17.14	71.8	0.49	72.34	1.74	33.79	16.5	49.71	2.09115	San_Pedro	AF
C.4.2	6.42	0.71	1.22404	0.08	679.29	0.4	778.61	69.59	66.24	112.69	0.25	32.34	5.36	28.54	20.8	50.66	2.48083	San_Pedro	AF
C.6.4	4.95	0.74	1.27576	0.09	1060.23	0.21	222.92	125.97	114	61.44	0.96	115.24	4.23	69.35	8.89	21.76	1.63057	San_Pedro	AF
C.6.6	5.1	1.15	1.9826	0.11	1014.23	0.31	161.08	192.94	92.8	91.45	0.81	102.95	3.96	63.31	10.94	25.75	2.67017	San_Pedro	AF
A.3.2	6.29	0.96	1.65504	0.08	761.25	0.36	687.59	89.15	46.04	101.77	0.39	44.46	4.87	33.72	18.18	48.1	3.1889	Duekoue	AF
A.3.7	6.37	0.69	1.18956	0.05	713.91	0.3	812.64	88.64	38.06	119.68	0.33	40.94	4.79	34.08	15.36	50.56	2.40607	Duekoue	AF
A.2.4	7.94	3.03	5.22372	0.22	1151.79	0.77	8480.06	64.79	336.86	282.21	0.36	272.6	26.03	65.9	21.83	12.27	5.95431	Duekoue	AF
A.6.1	5.78	1.1	1.8964	0.08	671.92	0.28	588.7	155.36	70.25	110.18	0.43	35.53	5.72	34.98	19.9	45.12	3.45554	Duekoue	AF
A.2.7	6.28	2.35	4.0514	0.27	1245.78	0.76	1860.39	107.17	442.76	376.71	0.21	204.97	15.01	75.98	15.96	8.06	4.40657	Duekoue	AF
A.3.5	6.16	0.8	1.3792	0.05	498.74	0.27	686.65	103.88	44.91	90.04	0.39	28.92	3.98	24.36	18.34	57.3	3.22998	Duekoue	AF
A.6.3	5.53	0.9	1.5516	0.08	1146.46	0.34	318.48	108.75	37.51	93.85	0.56	75.84	4.77	44.95	16.01	39.04	2.54528	Duekoue	AF
A.1.5	5.81	0.55	0.9482	0.05	663.63	0.19	348.5	61.48	33.88	88.52	0.42	51.72	0.59	31.96	18.24	49.8	1.88884	Duekoue	AF
B.4.7	5.87	1.53	2.63772	0.13	842.58	0.44	989.74	130.69	83.85	167.82	0.45	53.76	8.97	43.7	20.16	36.14	4.13047	Guiglo	AF
B.6.2	5.22	1.03	1.77572	0.1	1174.23	0.31	219.76	140.31		138.28	0.38	131.71	4.79	60.83	12.9	26.27	2.40841	Guiglo	AF
B.2.3	4.58	1.92	3.31008	0.19	1200.75	0.39		321.66	38.68	158.51	1.17	127.59	7.12	68.65	14.53	16.82	3.97942	Guiglo	AF
B.2.2	5.11	0.83	1.43092	0.07	932.09	0.21	258.51	227.96	25.6	119.59	0.67	122.23	3.73	50.56	17.69	31.75	2.09659	Guiglo	AF
B.6.5	5.1	1.27	2.18948	0.11	1023.06	0.35	592.28	164.06	46.62	116.63	0.45	94.7	6.05	60.15	12.79	27.06	3.00175	Guiglo	AF
B.6.7	5.69	1.26	2.17224	0.09	905.75	0.39	818.71	194.09	54.03	148.24	0.39	74.14	9.85	47.12	15.91	36.97	3.44636	Guiglo	AF
B.4.1	5.52	1.16	1.99984	0.07	674.16	0.21	623.83	207.47	53.99	130.61	0.49	71.39	6.06	37.64	21.93	40.43	3.35713	Guiglo	AF
B.6.1	4.98	0.66	1.13784	0.07	985.52	0.24	170.51	118.24		97.09	0.63	91.94	2.01	49.94	14.8	35.26	1.75755	Guiglo	AF
B.7.9	5.21	0.52	0.89648	0.05	697.13	0.23	55.78	216.13	24.67	62.48	0.72	89.49	0.4	36.08	15.56	48.36	1.73602	Guiglo	AF
D.3.2	5.8	1.31	2.25844	0.11	1015.01	0.39	673.84	123.84	86.9	220.77	0.37	98.32	7.55	58.69	13.97	27.34	3.10823	Oume	AF
D.1.8	6.78	1.05	1.8102	0.06	541.39	0.31	1086.87	121	134.4	123.99	0.26	34.19	6.01	25.88	19.25	54.87	4.01108	Oume	AF
D.2.7	6.31	1.09	1.87916	0.08	766.84	0.32	617.41	139.47	62.54	156.93	0.45	64.36	7.21	47.44	18.03	34.53	2.87026	Oume	AF
D.1.5	5.5	0.37	0.63788	0.03	274.1	0.13	290.93	124.54		52.7	0.26	38.94	3.41	13.64	14.14	72.22	2.29618	Oume	AF
D.4.4	6.52	2.14	3.68936	0.18	939.7	0.65	2511.11	127.53	138.42	244.76	0.28	43.23	14.8	56.29	16.65	27.06	5.05808	Oume	AF
D.3.8	5.71	1.19	2.05156	0.1	963.12	0.36	656.24	107.01	61.72	176.32	0.43	77.09	7.07	58.84	12.08	29.08	2.89278	Oume	AF
D.4.8	6	1.08	1.86192	0.09	844.36	0.37	731.29	142.71	50.62	184.6	0.33	58.51	7.42	51.16	15.48	33.36	2.794	Oume	AF
D.1.6	7.47	0.79	1.36196	0.05	479.89	0.25	1481.74	152.42	98.73	115.31	0.3	31	9.11	22.81	17.3	59.89	3.39556	Oume	AF
D.2.4	5.52	0.98	1.68952	0.08	1085.11	0.29	838.36	109.59	130.72	230.1	0.43	116.01	8.47	63.31	12.8	23.89	2.21984	Oume	AF
D.4.3	7.22	1.51	2.60324	0.11	780.19	0.51	1813.54	139.04	79.11	196.42	0.33	49.88	12.01	48.4	15.11	36.49	4.09895	Oume	AF
D.3.3	6.54	1.17	2.01708	0.08	682.25	0.4	963.76	123.17	29.76	178.58	0.41	40.81	7.27	36.56	20.11	43.33	3.55934	Oume	AF
D.1.4	6.36	0.97	1.67228	0.05	329.58	0.3	889.51	100.05	73.51	90.2	0.3	22.85	6.03	16.11	14.86	69.03	5.39968	Oume	AF
D.2.2	5.91	0.94	1.62056	0.07	769.11	0.25	723.5	73.3	134.72	193.32	0.45	95.63	5.75	43.48	19.17	37.35	2.58669	Oume	AF
D.2.5	6.18	1.72	2.96528	0.15	995.73	0.54	1451.52	101.83	125.76	250.06	0.35	67.83	13.22	59.68	16.03	24.29	3.91663	Oume	AF
D.3.9	5.83	0.54	0.93096	0.04	438.69	0.16	330.03	182.59	43.56	82.15	0.27	40.72	3.37	20.53	16.23	63.24	2.53254	Oume	AF
D.4.1	6.4	1.6	2.7584	0.14	762.83	0.5	1094.57	160.06	72.56	174.74	0.34	39.51	9.73	44.96	18.62	36.42	4.33847	Oume	AF
F.5.2	5.79	1.52	2.62048	0.15	977.32	0.5	1461.01	174.11	113.25	238.72	0.31	88.51	12.33	52.63	22.09	25.28	3.50707	Abengourou	AF
F.5.6	6.72	2.32	3.99968	0.2	999.24	0.65	2797.05	127.37	263.03	337.06	0.26	68.75	17.08	52.79	22.9	24.31	5.28429	Abengourou	AF
F.1.2	6.55	1.77	3.05148	0.16	1095.92	0.57	2091.91	115.61	299.54	349.36	0.38	81.09	14.48	49.69	24.72	25.59	4.1009	Abengourou	AF
F.6.1	6.03	1.61	2.77564	0.15	873.89	0.41	1339.36	206.8	111.43	226.74	0.35	92.28	12.26	50.25	24.3	25.45	3.72319	Abengourou	AF
F.1.3	5.49	1.36	2.34464	0.14	1008.09	0.4	863.29	167.16	102.81	177.64	0.35	86.93	9.59	52.04	21.27	26.69	3.19825	Abengourou	AF
F.5.3	5.47	0.94	1.62056	0.12	1194.04	0.35	1047.08	106.01	32.45	189.28	0.41	154.05	8.51	66.56	13.65	19.79	2.0204	Abengourou	AF
F.4.2	6.98	1.87	3.22388	0.16	1010.06	0.6	2185.76	121.96	113.47	272.44	0.36	57.32	14.34	50.19	18.2	31.61	4.71396	Abengourou	AF
F.1.1	6.55	1.82	3.13768	0.15	970.8	0.57	2056.57	136.41	233.3	290.41	0.3	63.99	15.15	49.33	20.63	30.04	4.48496	Abengourou	AF
F.2.1	6.24	0.12	0.20688	0.03	429.85	0.13	368.31	216.23	30.38	90.85	0.3	51.88	2.33	24.04	16.15	59.81	0.514755	Abengourou	AF
F.4.8	6.19	0.88	1.51712	0.09	653.56	0.37	1147.14	160.01	48.99	164.77	0.45	63.95	6.5	35.66	21.48	42.86	2.65509	Abengourou	AF
F.6.5	6.61	1.25	2.155	0.12	716.03	0.48	1126.4	147.52	87.21	172.29	0.41	56.24	8.27	38.42	23.41	38.17	3.48536	Abengourou	AF
E.2.9	5.88	0.63	1.08612	0.07	605.03	0.29	795.94	250.09	45.41	92.86	0.44	49.11	7.06	29.08	20.23	50.69	2.20264	Agboville	AF
E.2.2	6.6	0.86	1.48264	0.06	579.31	0.28	879.82	175.44	71.95	152.76	0.29	41.11	6.18	32.79	17.75	49.46	2.9336	Agboville	AF
E.4.6	6.48	1.49	2.56876	0.1	688.41	0.5	1503.07	121.43	62.63	170.28	0.43	44.76	10.88	37.34	17.18	45.48	4.71159	Agboville	AF
E.1.7	5.82	1.67	2.87908	0.18	1019.11	0.45	1025.65	219.94	95.04	419.46	0.36	132.54	14.12	59.45	21.1	19.45	3.57428	Agboville	AF
E.1.4	5.15	0.96	1.65504	0.08	919.06	0.17	322.34	352.48	63.1	64.72	0.64	121.5	4.8	48.34	22.48	29.18	2.33697	Agboville	AF
E.3.6	6.24	2.04	3.51696	0.15	878.06	0.55	2437.8	145.82	62.02	289.56	0.31	58.49	16.34	51.53	18.47	30	5.02423	Agboville	AF
E.2.6	6.57	0.92	1.58608	0.06	484.74	0.28	941.9	164.5	43.55	134.96	0.44	36.75	8.79	19.73	19.53	60.74	4.03994	Agboville	AF
E.2.1	6.51	1.17	2.01708	0.11	709.45	0.37	1272.18	189.38	84.38	164.88	0.3	52.89	10.03	46.49	20.65	32.86	3.00429	Agboville	AF
E.1.1	5.75	0.53	0.91372	0.04	402.39	0.14	396.59	202.58	11.82	44.07	0.41	78.24	2.87	18.44	19.79	61.77	2.39006	Agboville	AF
E.2.3	6.18	1.44	2.48256	0.14	809.99	0.5	1707.02	107.69	93.5	250.47	0.41	42.75	12.53	48.5	20.09	31.41	3.61942	Agboville	AF
E.1.9	5.15	0.57	0.98268	0.05	523.85	0.12	217.57	215.28	8.9	1.58	0.69	107.96	1.02	23	23.15	53.85	2.12932	Agboville	AF
E.2.8	5.84	0.99	1.70676	0.1	735.63	0.32	667.18	273.96	61.38	57.47	0.4	59.05	7.51	39.84	23.22	36.94	2.70657	Agboville	AF
E.2.7	5.94	0.87	1.49988	0.11	750.77	0.36	724.93	283.13	69.52	11.15	0.4	55.91	8.28	38.69	23.07	38.24	2.42856	Agboville	AF
E.1.2	5.08	0.41	0.70684	0.05	596.18	0.1	274.39	166.55	13.87		0.81	117.55	0.95	28.64	25.47	45.89	1.3063	Agboville	AF
C.5.2	5.23	1.14	1.96536	0.08	902.3	0.25	380.75	216.89	33.42	165.27	0.5	102.42	8.38	52.85	20.31	26.84	2.68639	San_Pedro	AF
C.2.2	5.31	1.16	1.99984	0.08	949	0.23	283.42	285.56	74.34	132.14	0.5	88.54	11.26	55.63	17.45	26.92	2.73651	San_Pedro	AF
C.6.5	5.55	1.31	2.25844	0.11	993.12	0.32	702.44	131.9	108.78	134.06	0.6	111.47	6.17	65.88	10.46	23.66	2.9584	San_Pedro	AF
A.1.9	5	0.96	1.65504	0.09	1198.38	0.23	189.59	140.08	38.74	67.07	0.55	127.47	1.53	49.81	18.8	31.39	2.41224	Duekoue	AF
A.3.4	6.96	1.3	2.2412	0.1	852.81	0.43	1281.42	115.3	154.22	162.22	0.37	38.49	8.53	38.54	19.33	42.13	3.87282	Duekoue	AF
A.6.2	7.06	1.29	2.22396	0.11	897.82	0.48	1068.26	93.67	85.34	117.82	0.35	29.33	7.28	35.43	18.26	46.31	4.14222	Duekoue	AF
A.5.3	5.97	1.39	2.39636	0.17	1182.54	0.41	972.75	102.47	159.82	190.56	0.35	98.06	6.71	58.94	19.23	21.83	3.06558	Duekoue	AF
A.2.5	6.37	1.3	2.2412	0.14	1120.44	0.5	976.09	85.33	48.27	170.52	0.32	85.79	7.49	59.01	16.43	24.56	2.97084	Duekoue	AF
A.6.5	5.46	0.8	1.3792	0.07	1096.67	0.27	221.26	108.44	21.95	90.31	0.57	60.52	1.37	44.22	17.4	38.38	2.23823	Duekoue	AF
A.4.4	6.23	2.21	3.81004	0.26	1296.66	0.71	1910.54	86.79	578.21	275.38	0.24	189.01	12.99	72.32	17.75	9.93	4.23009	Duekoue	AF
A.2.1	5.93	1.38	2.37912	0.13	1110.83	0.46	976.35	115.03	27.15	123.22	0.33	73.02	8.81	55.94	16.45	27.61	3.28653	Duekoue	AF
A.5.1	6.07	1.76	3.03424	0.19	1222.29	0.58	1427.32	91.93	177.94	199.56	0.21	146.92	12.34	69.67	15.47	14.86	3.56382	Duekoue	AF
A.1.3	5.69	1.15	1.9826	0.11	1212.8	0.35	539.11	104.87	106.99	100.43	0.33	118.45	4.99	57.57	16.84	25.59	2.66443	Duekoue	AF
A.6.7	5.37	1.09	1.87916	0.09	1115.59	0.29	364.32	103.49	41.14	92.89	0.52	62.76	3.59	48.57	16.77	34.66	2.87597	Duekoue	AF
A.2.3	5.42	1.22	2.10328	0.12	1160.09	0.3	353.6	136.52	65.96	112.91	0.51	64.81	3.09	43.35	22.86	33.79	3.17668	Duekoue	AF
A.5.2	5.38	1.17	2.01708	0.14	1237.79	0.35	453.16	124.92	146.39	198.42	0.44	116.21	3.69	61.5	18.01	20.49	2.53689	Duekoue	AF
A.1.4	5.22	1.01	1.74124	0.09	1157.82	0.26	394.72	93.18	80.91	95.26	0.46	85.53	3.14	40.1	22.88	37.02	2.76475	Duekoue	AF
A.5.5	6.02	1.09	1.87916	0.11	1149.09	0.37	667.15	99.82	105.93	110.87	0.3	74.57	6.89	57.21	16.2	26.59	2.55981	Duekoue	AF
A.2.2	5.83	1.26	2.17224	0.11	1063.12	0.38	640.61	106.88	74.89	110.58	0.35	52.24	5.82	42.9	20.24	36.86	3.44035	Duekoue	AF
A.5.7	6.25	2.1	3.6204	0.22	1167.73	0.68	1785.87	95.94	165.47	313.33	0.23	129.32	12.62	69.17	17.89	12.94	4.15851	Duekoue	AF
A.6.8	6.13	1.46	2.51704	0.11	1080.62	0.49	938.55	53.37	75.89	151.33	0.35	45.85	9.56	48.33	16.56	35.11	3.87893	Duekoue	AF
A.6.6	5.23	0.73	1.25852	0.06	1056.76	0.23	206.18	105.06	31.63	79.11	0.62	65.74	2.15	40.8	17.32	41.88	2.16538	Duekoue	AF
A.1.1	5.77	1.05	1.8102	0.1	1081.97	0.33	657.97	109.44	67.85	131.61	0.37	59.76	5.14	41.97	23.76	34.27	2.75399	Duekoue	AF
A.5.4	4.97	0.83	1.43092	0.12	1054.91	0.28	164.87	231.08	50.5	91.18	0.77	115.46	0.68	54.62	18.42	26.96	1.95909	Duekoue	AF
A.4.2	5.93	1.84	3.17216	0.16	1193.14	0.53	1388.54	100.84	140.66	159.71	0.3	69.4	10.18	61.57	15.48	22.95	4.11701	Duekoue	AF
A.4.5	5.05	1.08	1.86192	0.11	1116.92	0.29	369.56	138.06	70.76	150.34	0.55	129.9	4.4	57.6	16.97	25.43	2.49688	Duekoue	AF
B.5.5	6.92	1.58	2.72392	0.13	674.55	0.59	1867.62	130.87	71.71	186.47	0.44	29.75	11.48	33.58	15.93	50.49	5.50176	Guiglo	AF
B.2.7	5.63	1.11	1.91364	0.1	801.43	0.33	406.34	192.77	61.57	135	0.4	55.33	4.95	45.77	18.83	35.4	2.96229	Guiglo	AF
B.2.9	5.54	1.48	2.55152	0.15	945.89	0.36	641.45	207.34	64.3	176.91	0.53	52.51	6.57	42.71	26.02	31.27	3.71238	Guiglo	AF
B.6.3	4.9	1.08	1.86192	0.08	1041.53	0.29	3.74	216.86	1.82	87.92	0.74	125.24	2.39	49.3	13.4	37.3	2.96957	Guiglo	AF
B.6.8	5.04	0.78	1.34472	0.07	1158.85	0.24	175.1	119.23	4.3	87.49	0.42	119.16	0.94	56.65	14.55	28.8	1.88865	Guiglo	AF
B.7.3	5.08	1.24	2.13776	0.11	1035.85	0.22	315.48	215.34	40.14	79.73	0.63	101.62	2.04	52.89	17.95	29.16	3.01773	Guiglo	AF
B.4.2	5.03	1.21	2.08604	0.13	1066.97	0.33	337.02	240.11	44.27	110.75	0.61	126.9	4.09	56.64	18.17	25.19	2.78845	Guiglo	AF
B.4.6	5.49	1.16	1.99984	0.09	607.7	0.29	628.18	193.52	54.71	114	0.42	55.77	6.22	34.73	19.17	46.1	3.71028	Guiglo	AF
B.2.4	5.35	1.28	2.20672	0.12	872.94	0.26	629.59	190.89	28.77	174.24	0.59	94.56	5.55	46.98	26.21	26.81	3.01506	Guiglo	AF
B.5.6	4.96	0.53	0.91372	0.04	506.29	0.14	202.66	131.5	19.48	41.27	0.45	63.21	3.51	24.6	18.8	56.6	2.10535	Guiglo	AF
B.5.2	5.43	0.53	0.91372	0.04	432.66	0.14	215.13	151.65	56.96	81.36	0.34	65.47	3.99	22.83	17.74	59.43	2.25221	Guiglo	AF
B.7.5	5.62	1.2	2.0688	0.11	988.91	0.36	828.52	113.05	63.25	122.88	0.32	64.39	4.7	51.96	17.09	30.95	2.99609	Guiglo	AF
B.5.3	4.95	0.66	1.13784	0.06	630.19	0.19	182.43	254.2	63.77	74.98	0.6	79.1	2.8	31.85	20.36	47.79	2.17935	Guiglo	AF
D.3.7	6.08	0.66	1.13784	0.04	376.86	0.19	543.93	113.49	33.67	76.24	0.25	33.19	5.13	17.97	15.95	66.08	3.35448	Oume	Fallow
D.4.9	8.87	4.11	7.08564	0.23	897.59	0.75	9579.07	60.21	375.73	790.41	0.33	100.97	37.85	55.44	23.61	20.95	8.96349	Oume	Fallow
D.4.7	6.95	1.36	2.34464	0.08	495.14	0.44	1434.67	148.94	84.26	115.13	0.43	38.66	10.95	23.67	17.82	58.51	5.6511	Oume	Fallow
D.5.4	8.29	1.73	2.98252	0.1	777.48	0.5	2499.18	90.81	492.91	306.29	0.4	72.89	14.72	48.68	17.46	33.86	4.5094	Oume	Fallow
D.2.9	5.46	1.45	2.4998	0.12	1096.84	0.36	757.91	126.16	153.4	260.41	0.49	121.8	8.64	63.49	15.21	21.3	3.17637	Oume	Fallow
D.5.6	8.68	1.78	3.06872	0.1	762	0.59	2835.32	60.68	133.29	165.53	0.47	54.23	18.88	49.87	14.77	35.36	4.7474	Oume	Fallow
D.4.6	6.06	0.88	1.51712	0.06	572.18	0.28	647.25	126.61	32.49	107.73	0.42	39.88	4.98	28.01	19.1	52.89	3.22038	Oume	Fallow
D.5.1	7.34	1.65	2.8446	0.14	928.33	0.56	1640.39	105.51	304.54	281.94	0.45	84.99	12.55	56.77	12.36	30.87	4.11486	Oume	Fallow
D.5.5	7.01	1.66	2.86184	0.12	888.74	0.48	1935.91	113.47	157.18	296.52	0.31	68.79	14.65	57.04	15.08	27.88	3.96816	Oume	Fallow
F.6.7	5.06	0.32	0.55168	0.04	659.45	0.13	160.92	214.13	46.28	27.5	0.52	99.85	5.15	32.33	19.6	48.07	1.06235	Abengourou	Fallow
F.6.9	6.29	0.65	1.1206	0.05	414.45	0.2	598.43	154.73	54.01	109.05	0.41	48.15	3.99	21.05	20.6	58.35	2.69052	Abengourou	Fallow
F.1.5	5.66	0.38	0.65512	0.04	431.1	0.12	167.65	187.99	35.58	42.3	0.4	64.35	0.87	22	20.39	57.61	1.54546	Abengourou	Fallow
F.1.6	5.73	1.63	2.81012	0.16	1016.54	0.44	1203.48	166.91	120.97	208.76	0.28	77.67	9.81	52.07	22.37	25.56	3.77501	Abengourou	Fallow
F.1.9	7.61	1.16	1.99984	0.09	504.69	0.39	1733.79	187.02	148.54	168.56	0.37	33.93	10.62	26.64	20.61	52.75	4.23247	Abengourou	Fallow
F.2.8	5.86	1.91	3.29284	0.17	1024.03	0.53	2025.83	123.99	215.32	375	0.27	107.48	16.78	61.48	19.98	18.54	4.04228	Abengourou	Fallow
F.3.9	6.63	1.37	2.36188	0.15	777.03	0.55	1392.86	145.9	97.12	243.72	0.43	43.39	8.96	42.23	22.49	35.28	3.64938	Abengourou	Fallow
F.6.6	5.19	1.12	1.93088	0.09	1223.41	0.32	919.37	157.6	51.61	181.36	0.4	125.44	11.46	66.21	11.94	21.85	2.47074	Abengourou	Fallow
E.2.4	6.27	1.15	1.9826	0.11	630.38	0.46	1014.05	105.57	127.44	150.15	0.48	37.78	7.6	37.46	19.53	43.01	3.47886	Agboville	Fallow
E.4.2	6.2	2.19	3.77556	0.18	922.44	0.65	3064.45	137.82	105.48	504.57	0.33	72.7	19.53	59.26	16.83	23.91	4.96197	Agboville	Fallow
E.4.3	7.42	0.97	1.67228	0.08	796.14	0.45	2442.07	200.48	84.8	160.84	0.37	64.29	12.58	46.77	13.94	39.29	2.75454	Agboville	Fallow
E.4.8	5.62	0.89	1.53436	0.07	699.3	0.28	625.3	170.38	76.61	106.57	0.45	70.26	6.8	41.34	17.14	41.52	2.62373	Agboville	Fallow
E.4.9	5.53	1.34	2.31016	0.11	762.67	0.35	791.5	187.18	48.24	136.38	0.52	57.53	8.7	39.78	19.82	40.4	3.87611	Agboville	Fallow
C.3.5	4.84	1.42	2.44808	0.15	1108.79	0.37	247.3	199.9	66.26	218.25	0.76	115.51	8.6	68.78	17.34	13.88	2.84264	San_Pedro	Fallow
C.6.8	4.6	1.1	1.8964	0.12	1102.92	0.3	41.12	189.01	5.85	18.09	1.3	198.65	3.15	73.99	9.08	16.93	2.28289	San_Pedro	Fallow
C.2.5	5.15	0.58	0.99992	0.04	620.02	0.18	100.29	187.06	32.82	65.61	0.34	68.38	1.83	33.49	19.13	47.38	1.90027	San_Pedro	Fallow
C.2.3	5.04	0.6	1.0344	0.05	680.99	0.24	144.93	280.66	23.07	47.6	0.36	56.95	3.46	33.49	19.4	47.11	1.95576	San_Pedro	Fallow
C.5.4	5.2	1.3	2.2412	0.1	1083.48	0.29	568.99	310.84	53.78	166.66	0.59	92.31	11.9	58.6	19.89	21.51	2.8554	San_Pedro	Fallow
C.5.3	4.84	1.09	1.87916	0.06	693.4	0.18	89.36	214.48		90.97	0.73	83.31	2.99	34.41	20.18	45.41	3.44232	San_Pedro	Fallow
A.4.3	6.3	1.69	2.91356	0.17	1190.21	0.53	1364.07	74.91	186.98	209.03	0.26	114.61	10.32	64	15.62	20.38	3.65933	Duekoue	Fallow
A.1.7	5.34	1.25	2.155	0.12	1238.74	0.34	672.25	119.5	54.01	111.67	0.32	104.95	5.9	57.24	18.23	24.53	2.85544	Duekoue	Fallow
B.7.7	5.49	0.95	1.6378	0.08	834.47	0.28	363.59	172.65	54.06	82.34	0.45	78.58	2.87	48.18	14.85	36.97	2.59845	Guiglo	Fallow
B.3.9	5.49	0.73	1.25852	0.05	592.75	0.2	160.84	208.28	73.13	73.83	0.38	40.82	2.21	29.47	17.52	53.01	2.67827	Guiglo	Fallow
B.6.9	4.95	0.77	1.32748	0.05	698.22	0.21	174.26	172.01	29.39	71.2	0.72	63.05	3.05	33.29	18.28	48.43	2.57413	Guiglo	Fallow
B.7.4	5.01	0.81	1.39644	0.06	515.17	0.18	189.11	209.42	44.09	64.94	0.69	55.68	3.28	24.56	17.91	57.53	3.28806	Guiglo	Fallow
